# Supplementary material for: Formation, structure, and reactivity of meso-tetraaryl-chlorolactones, -porpholactams, and -chlorolactams, porphyrin and chlorin analogues incorporating oxazolone or imidazolone moieties
Source: Royal Society of Chemistry journal article supplement (doi:10.1039/c3ob40138c), 2013-01-01
Supplement: c3ob40138c.pdf [file c3ob40138c.pdf]

## ELECTRONIC SUPPORTING INFORMATION (ESI)

to:

Formation, structure, and reactivity of meso-tetraaryl-  
chloro- $\alpha$ -lactones, porpholactams, and  $\alpha$ -chlorolactams, porphyrin and  
chlorin analogues incorporating oxazolone or imidazolone moieties

*Joshua Akhigbe<sup>†</sup>, John Haskoor<sup>†</sup>, Jeanette A. Krause<sup>‡</sup>,*

*Matthias Zeller<sup>§</sup>, and Christian Brückner<sup>†,\*</sup>*

Department of Chemistry, University of Connecticut, Storrs, CT 06269-3060, U.S.A.

Department of Chemistry, University of Cincinnati, Cincinnati, OH 45221-0172, U.S.A.

Department of Chemistry, Youngstown State University, Youngstown, OH 44555-3663, U.S.A.

\* author to whom inquiries should be addressed to:

E-mail: c.bruckner@uconn.edu

Tel: +01 860-908-2743

## ESI Table of Contents:

|                   |                                                                                               |    |
|-------------------|-----------------------------------------------------------------------------------------------|----|
| <b>Figure 1.</b>  | $^1\text{H}$ NMR Spectrum (400 MHz, $\text{CDCl}_3$ ) of <b>7a</b> .....                      | 4  |
| <b>Figure 2.</b>  | $^{13}\text{C}$ NMR Spectrum (100 MHz, $\text{CDCl}_3$ , D1 = 3s) of <b>7a</b> .....          | 5  |
| <b>Figure 3.</b>  | FT-IR Spectrum (neat, diffuse reflectance) of <b>7a</b> .....                                 | 6  |
| <b>Figure 4.</b>  | $^1\text{H}$ NMR Spectrum (400 MHz, $\text{CDCl}_3$ ) of <b>7b</b> .....                      | 7  |
| <b>Figure 5.</b>  | $^{13}\text{C}$ NMR Spectrum (100 MHz, $\text{CDCl}_3$ , D1 = 5s) of <b>7b</b> .....          | 8  |
| <b>Figure 6.</b>  | FT-IR Spectrum (neat, diffuse reflectance) of <b>7b</b> .....                                 | 9  |
| <b>Figure 7.</b>  | $^1\text{H}$ NMR Spectrum (400 MHz, $\text{CDCl}_3$ ) of <b>8a</b> .....                      | 10 |
| <b>Figure 8.</b>  | $^{13}\text{C}$ NMR Spectrum (100 MHz, $\text{CDCl}_3$ , D1 = 3s) of <b>8a</b> .....          | 11 |
| <b>Figure 9.</b>  | FT-IR Spectrum (neat, diffuse reflectance) of <b>8a</b> .....                                 | 12 |
| <b>Figure 10.</b> | $^1\text{H}$ NMR Spectrum (400 MHz, $\text{CD}_2\text{Cl}_2$ ) of <b>8b</b> .....             | 13 |
| <b>Figure 11.</b> | $^{13}\text{C}$ NMR Spectrum (100 MHz, $\text{CD}_2\text{Cl}_2$ , D1 = 5s) of <b>8b</b> ..... | 14 |
| <b>Figure 12.</b> | FT-IR Spectrum (neat, diffuse reflectance) of <b>8b</b> .....                                 | 15 |
| <b>Figure 13.</b> | $^1\text{H}$ NMR Spectrum (400 MHz, $\text{CDCl}_3$ ) of <b>8c</b> .....                      | 16 |
| <b>Figure 14.</b> | $^{13}\text{C}$ NMR Spectrum (100 MHz, $\text{CDCl}_3$ , D1 = 5s) of <b>8c</b> .....          | 17 |
| <b>Figure 15.</b> | FT-IR Spectrum (neat, diffuse reflectance) of <b>8c</b> .....                                 | 18 |
| <b>Figure 16.</b> | $^1\text{H}$ NMR Spectrum (400 MHz, $\text{CDCl}_3$ ) of <b>9a</b> .....                      | 19 |
| <b>Figure 17.</b> | $^{13}\text{C}$ NMR Spectrum (100 MHz, $\text{CDCl}_3$ , D1 = 3s) of <b>9a</b> .....          | 20 |
| <b>Figure 18.</b> | FT-IR Spectrum (neat, diffuse reflectance) of <b>9a</b> .....                                 | 21 |
| <b>Figure 19.</b> | $^1\text{H}$ NMR Spectrum (400 MHz, $\text{CD}_2\text{Cl}_2$ ) of <b>9b</b> .....             | 22 |
| <b>Figure 20.</b> | $^{13}\text{C}$ NMR Spectrum (100 MHz, $\text{CD}_2\text{Cl}_2$ , D1 = 5s) of <b>9b</b> ..... | 23 |
| <b>Figure 21.</b> | FT-IR Spectrum (neat, diffuse reflectance) of <b>9b</b> .....                                 | 24 |
| <b>Figure 22.</b> | $^1\text{H}$ NMR Spectrum (400 MHz, $\text{CDCl}_3$ ) of <b>9c</b> .....                      | 25 |
| <b>Figure 23.</b> | $^{13}\text{C}$ NMR Spectrum (100 MHz, $\text{CDCl}_3$ , D1 = 5s) of <b>9c</b> .....          | 26 |
| <b>Figure 24.</b> | FT-IR Spectrum (neat, diffuse reflectance) of <b>9c</b> .....                                 | 27 |
| <b>Figure 25.</b> | $^1\text{H}$ NMR Spectrum (400 MHz, $\text{CDCl}_3$ ) of <b>10a</b> .....                     | 28 |
| <b>Figure 26.</b> | $^{13}\text{C}$ NMR Spectrum (100 MHz, $\text{CDCl}_3$ , D1 = 3s) of <b>10a</b> .....         | 29 |
| <b>Figure 27.</b> | FT-IR Spectrum (neat, diffuse reflectance) of <b>10a</b> .....                                | 30 |
| <b>Figure 28.</b> | $^1\text{H}$ NMR Spectrum (400 MHz, $\text{CD}_2\text{Cl}_2$ ) of <b>10a</b> .....            | 31 |
| <b>Figure 29.</b> | $^{13}\text{C}$ NMR Spectrum (100 MHz, $\text{CD}_2\text{Cl}_2$ ) of <b>10b</b> .....         | 32 |
| <b>Figure 30.</b> | FT-IR Spectrum (neat, diffuse reflectance) of <b>10b</b> .....                                | 33 |
| <b>Figure 31.</b> | $^1\text{H}$ NMR Spectrum (400 MHz, $\text{CDCl}_3$ ) of <b>10c</b> .....                     | 34 |

|                   |                                                                                       |    |
|-------------------|---------------------------------------------------------------------------------------|----|
| <b>Figure 32.</b> | $^{13}\text{C}$ NMR Spectrum (100 MHz, $\text{CDCl}_3$ , D1 = 3s) of <b>10c</b> ..... | 35 |
| <b>Figure 33.</b> | FT-IR Spectrum (neat, diffuse reflectance) of <b>10c</b> .....                        | 36 |
| <b>Figure 34.</b> | $^1\text{H}$ NMR Spectrum (400 MHz, $\text{CDCl}_3$ ) of <b>11c</b> .....             | 37 |
| <b>Figure 35.</b> | $^{13}\text{C}$ NMR Spectrum (100 MHz, $\text{CDCl}_3$ , D1 = 3s) of <b>11c</b> ..... | 38 |
| <b>Figure 36.</b> | FT-IR Spectrum (neat, diffuse reflectance) of <b>11c</b> .....                        | 39 |
| <b>Figure 37.</b> | $^1\text{H}$ NMR Spectrum (400 MHz, $\text{CDCl}_3$ ) of <b>15a</b> .....             | 40 |
| <b>Figure 38.</b> | $^{13}\text{C}$ NMR Spectrum (100 MHz, $\text{CDCl}_3$ , D1 = 3s) of <b>15a</b> ..... | 41 |
| <b>Figure 39.</b> | FT-IR Spectrum (neat, diffuse reflectance) of <b>15a</b> .....                        | 42 |

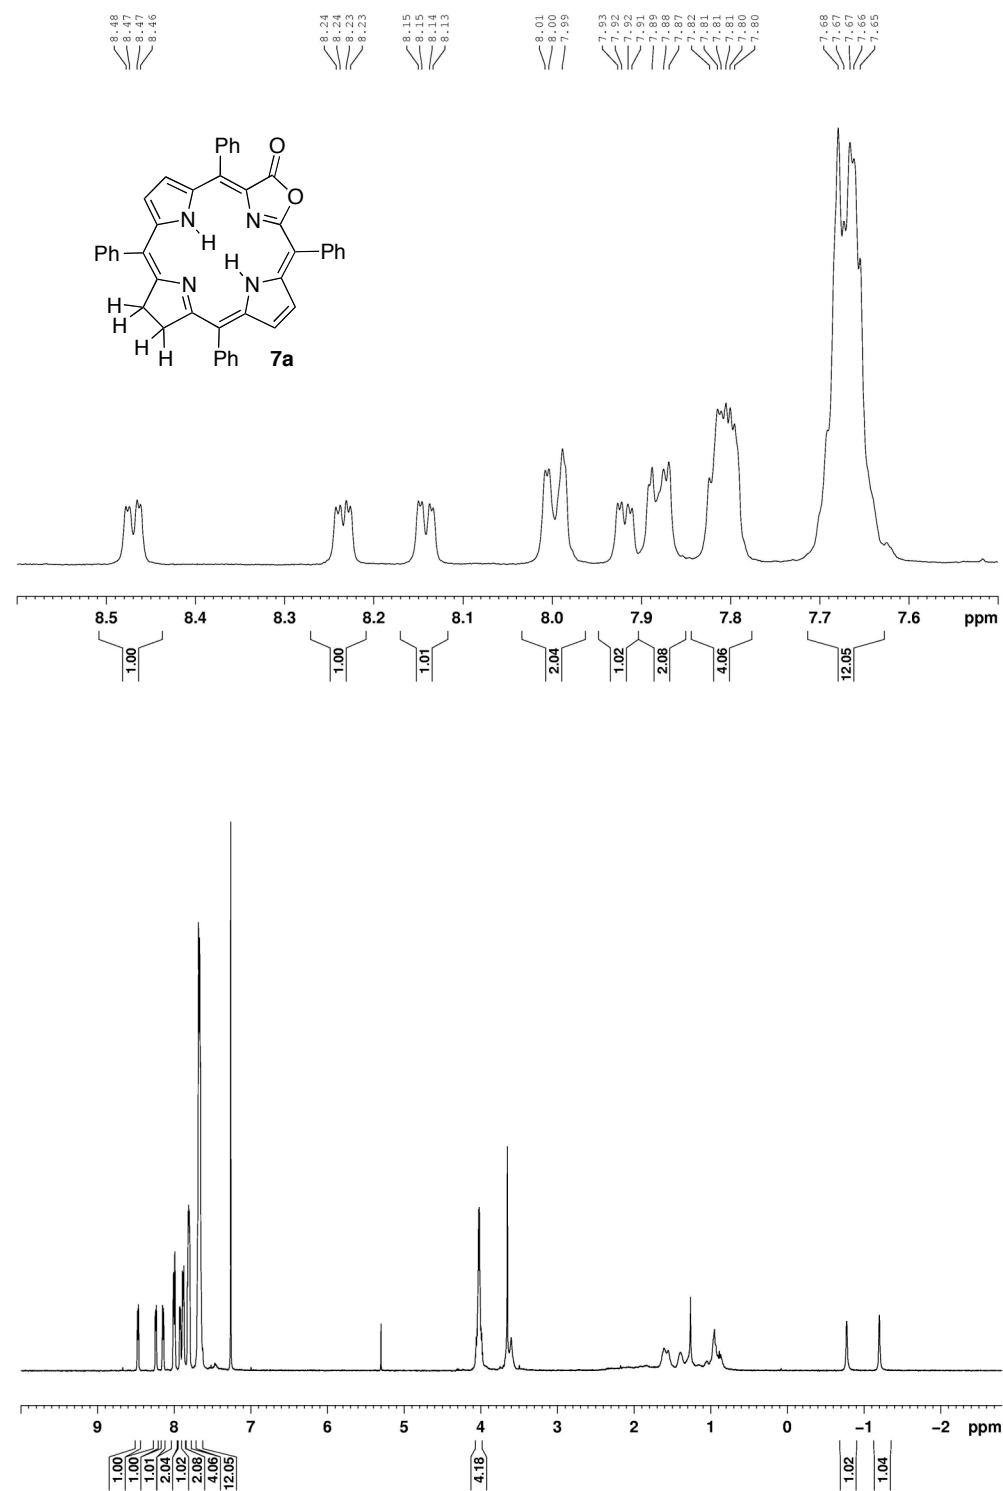

Figure 1. <sup>1</sup>H NMR Spectrum (400 MHz, CDCl<sub>3</sub>) of **7a**





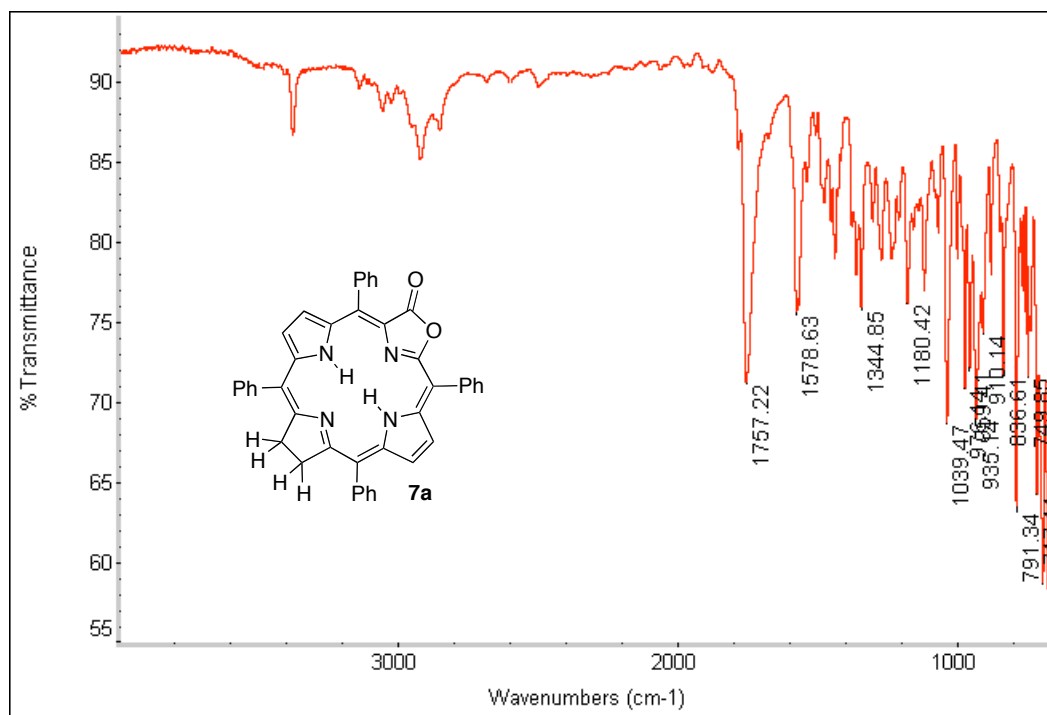

**Figure 3.** FT-IR Spectrum (neat, diffuse reflectance) of **7a**

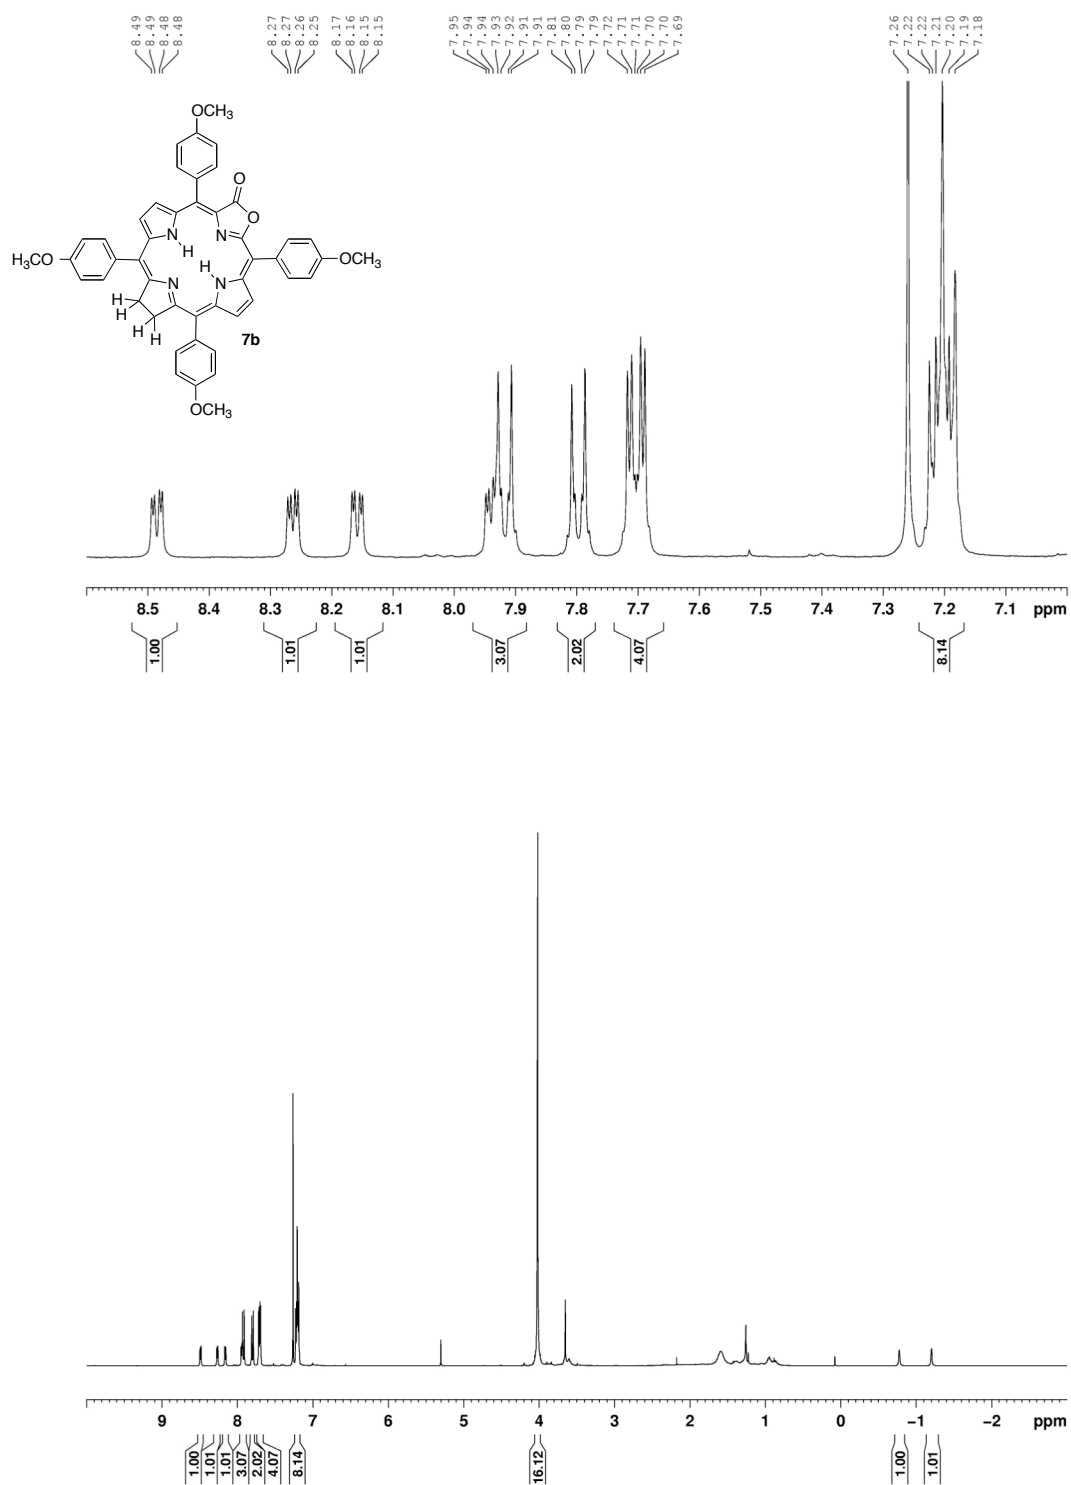

Figure 4. <sup>1</sup>H NMR Spectrum (400 MHz, CDCl<sub>3</sub>) of **7b**

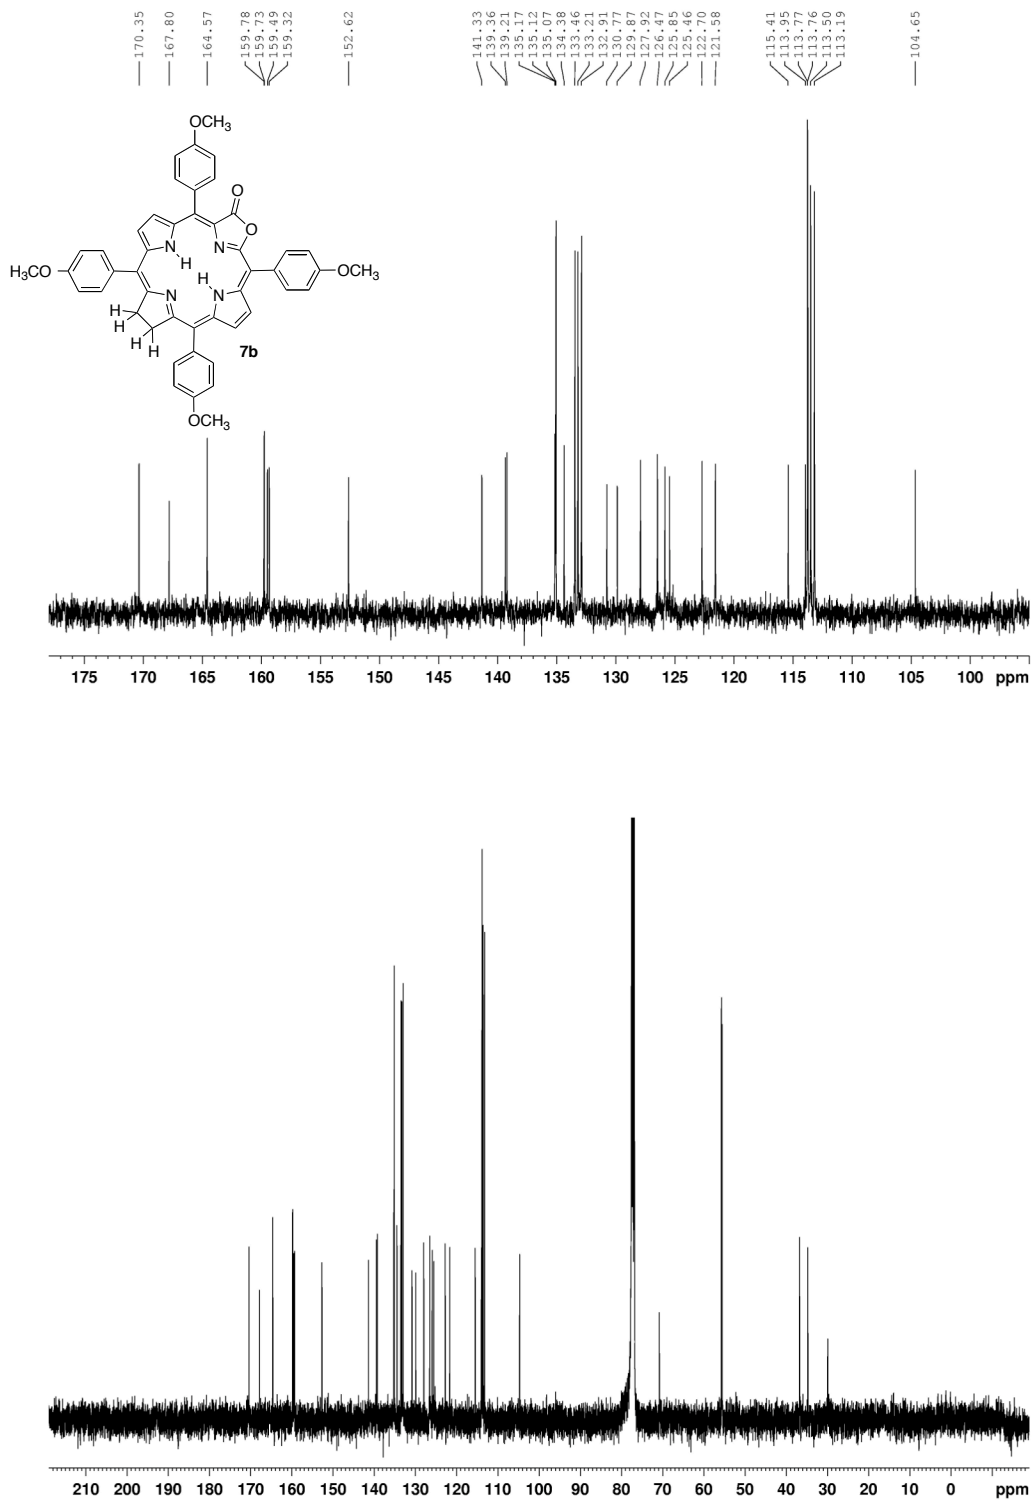

Figure 5.  $^{13}\text{C}$  NMR Spectrum (100 MHz,  $\text{CDCl}_3$ , D1 = 5s) of **7b**

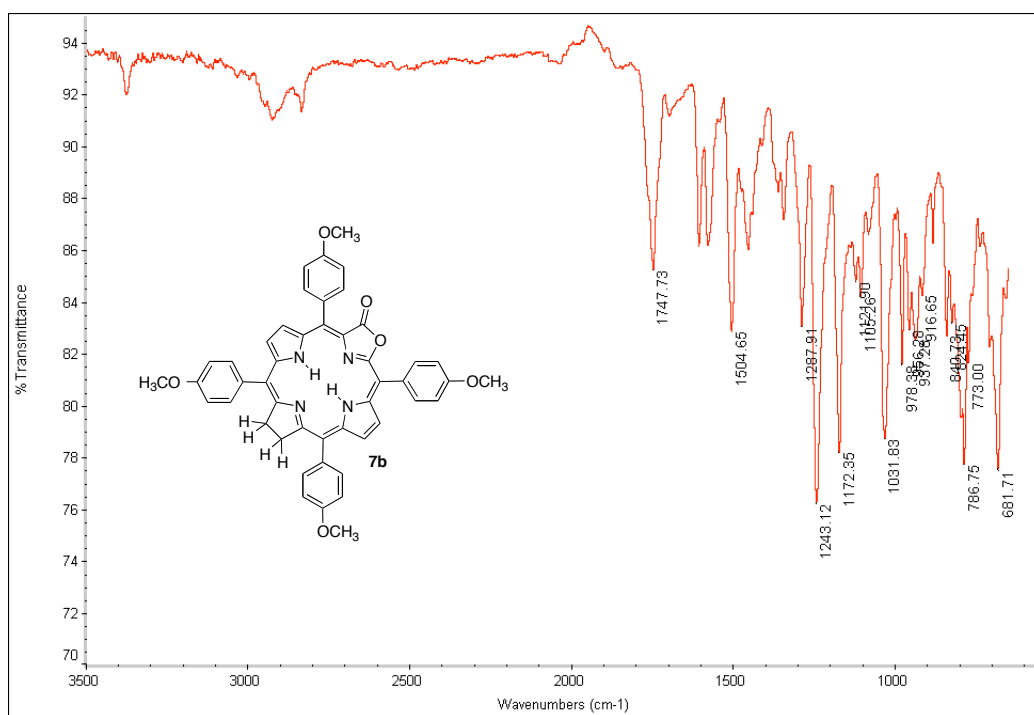

**Figure 6.** FT-IR Spectrum (neat, diffuse reflectance) of **7b**

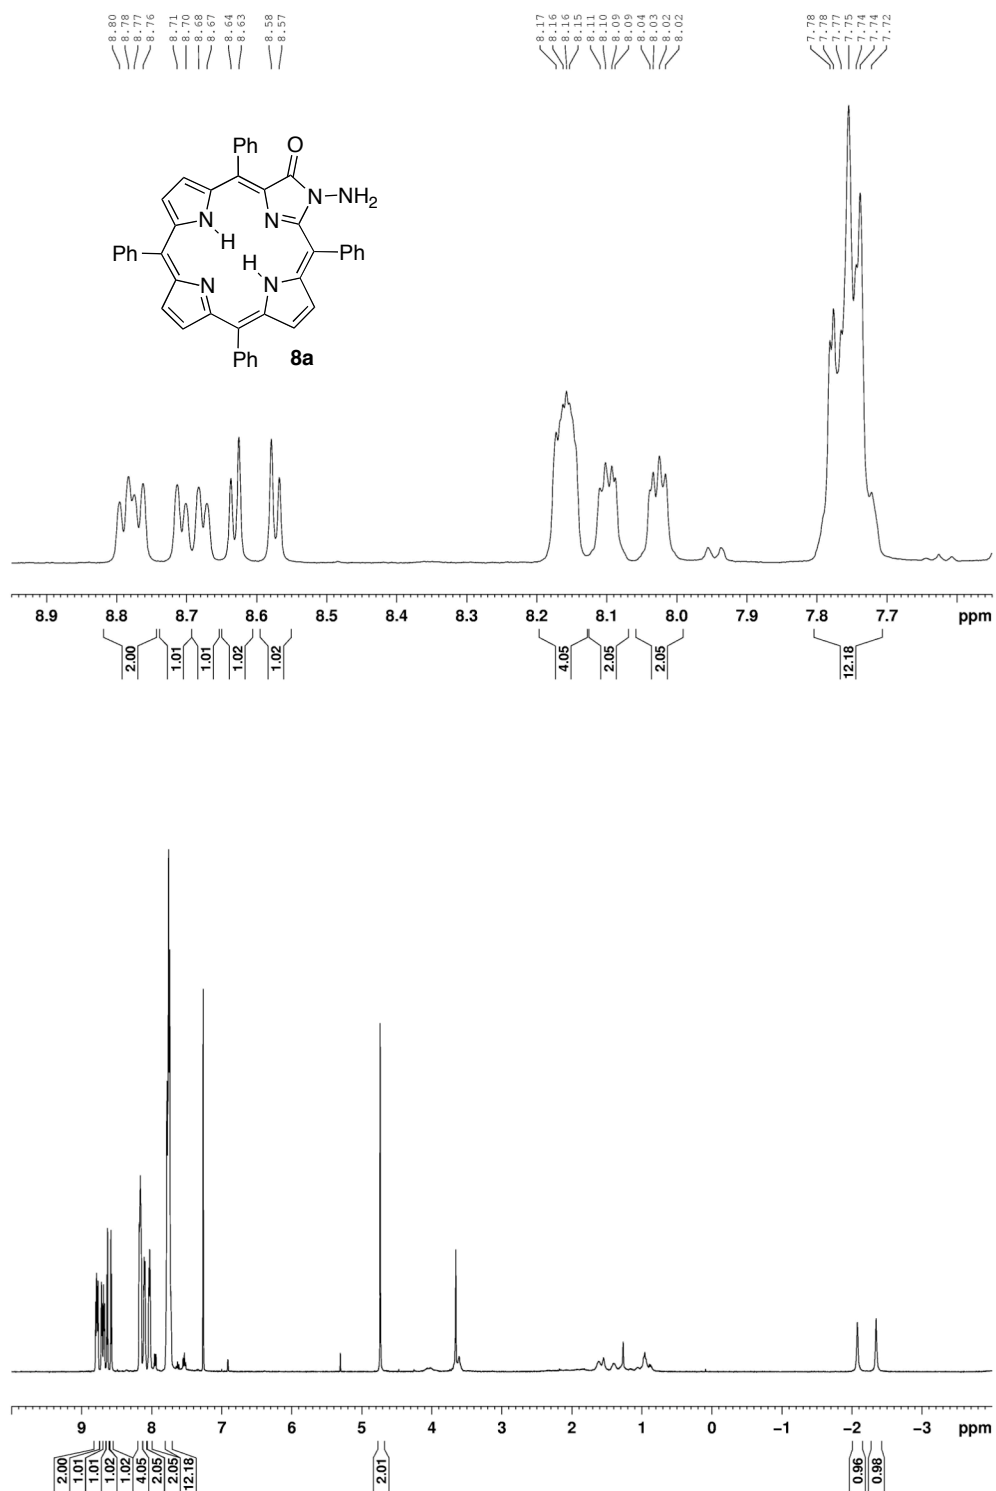

Figure 7. <sup>1</sup>H NMR Spectrum (400 MHz, CDCl<sub>3</sub>) of **8a**

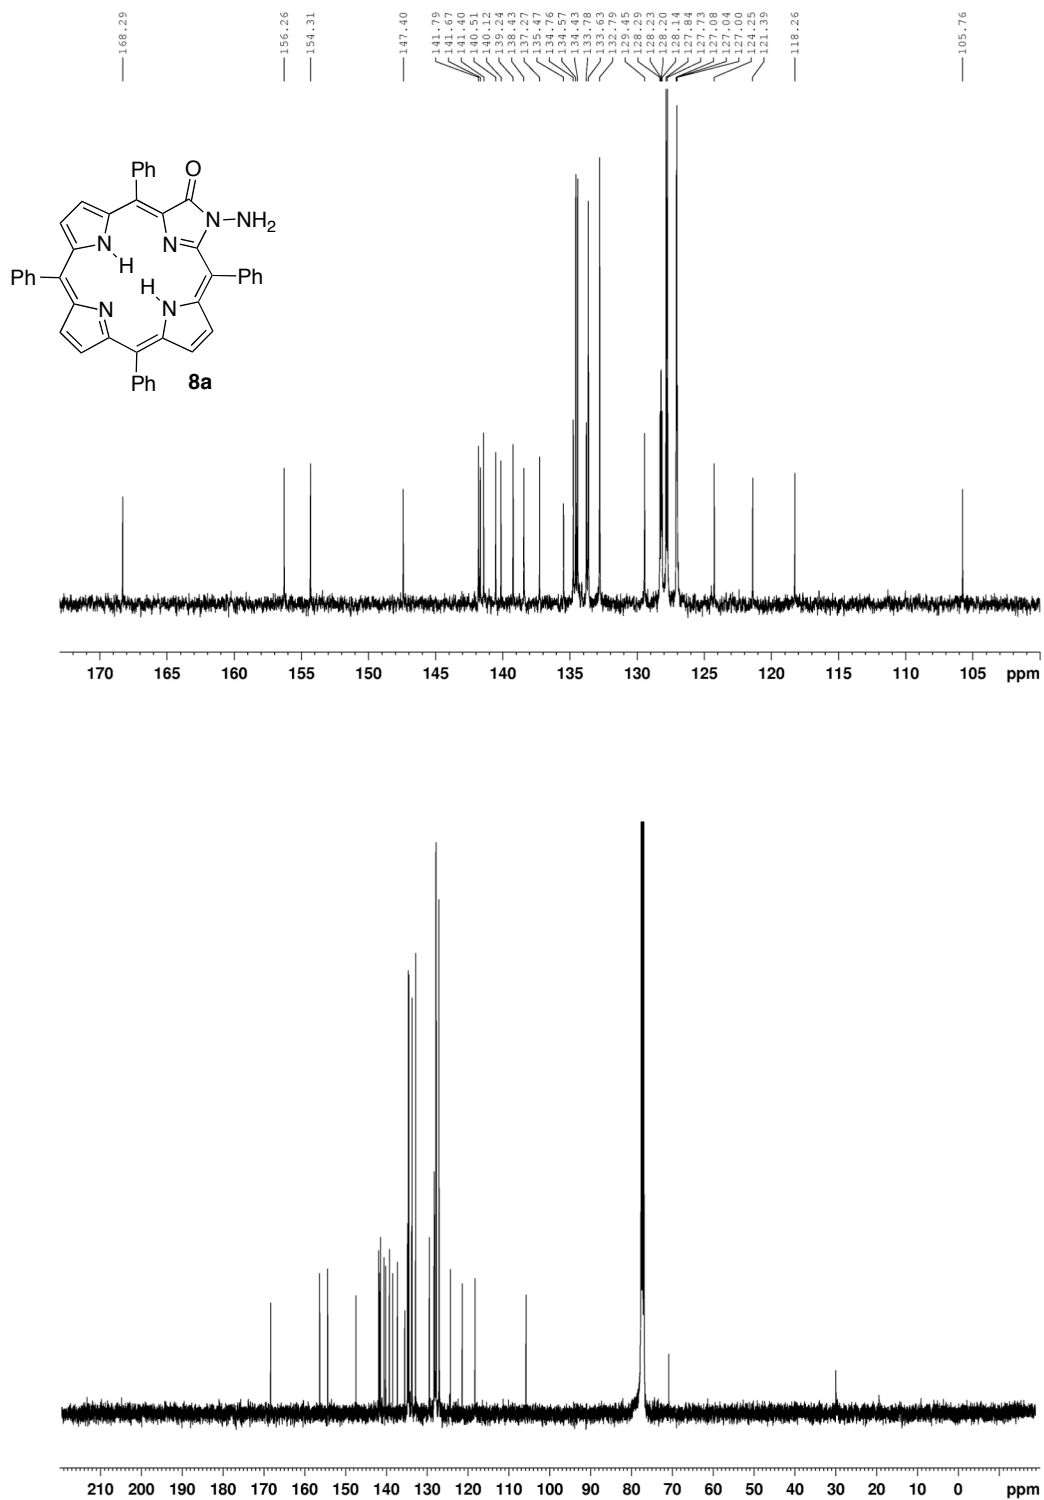

**Figure 8.** <sup>13</sup>C NMR Spectrum (100 MHz, CDCl<sub>3</sub>, D1 = 3s) of **8a**

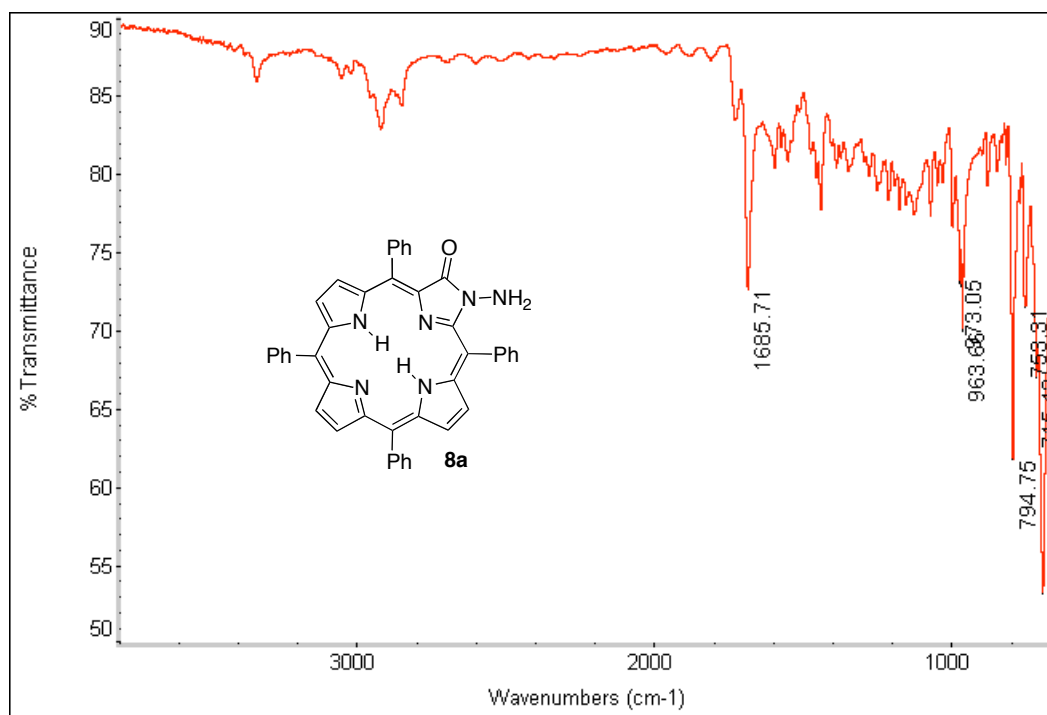

**Figure 9.** FT-IR Spectrum (neat, diffuse reflectance) of **8a**



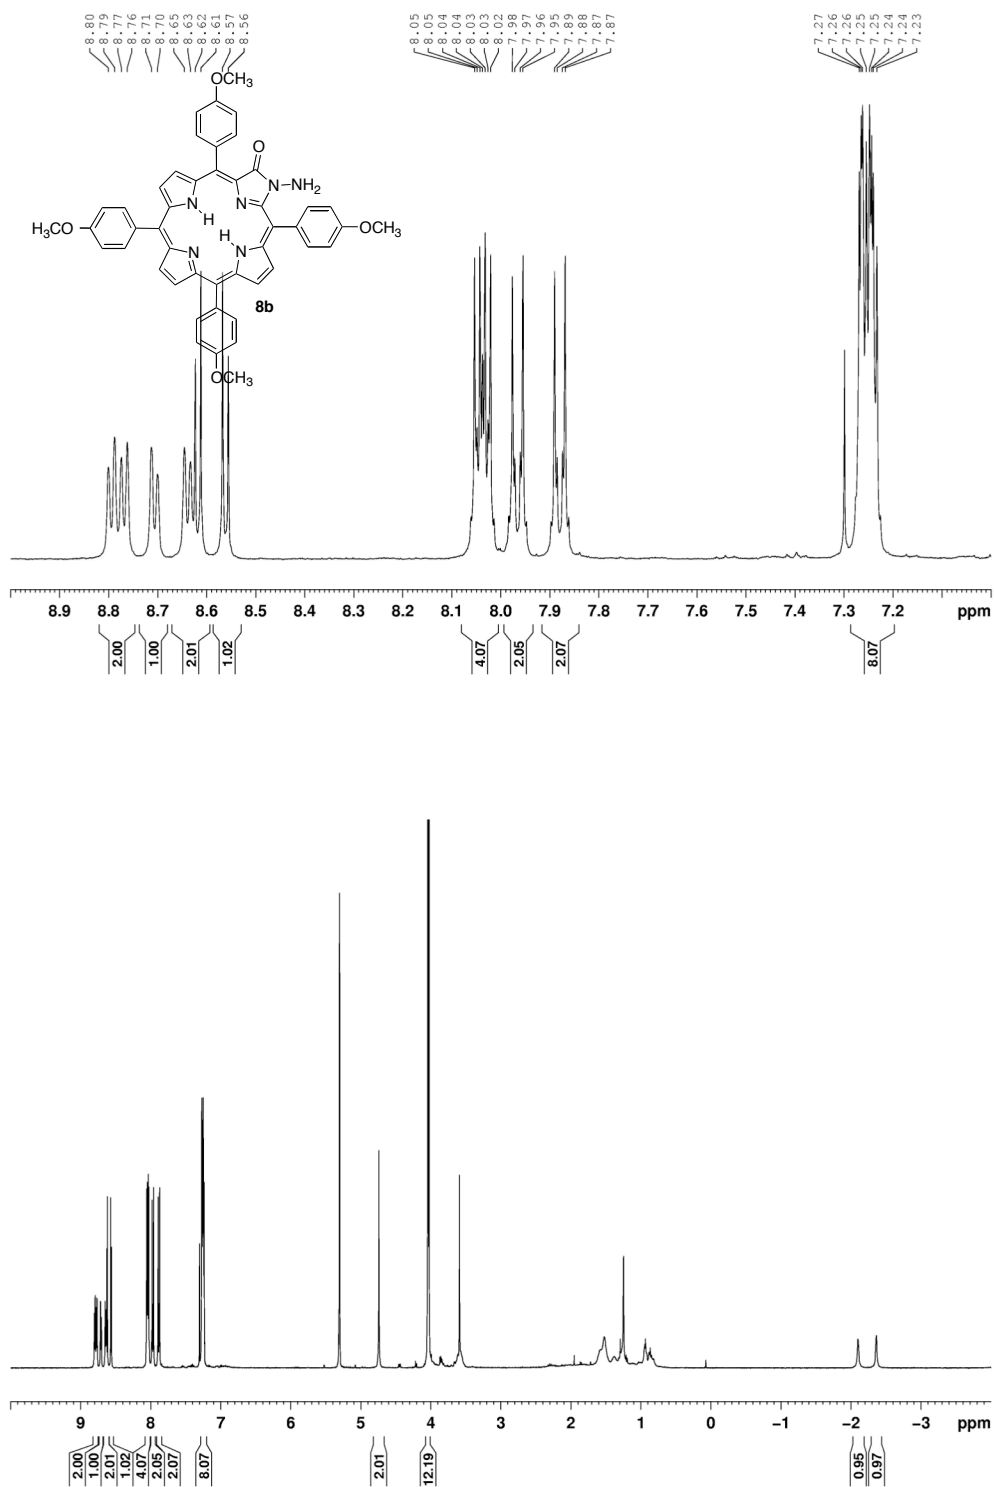

Figure 10.  $^1\text{H}$  NMR Spectrum (400 MHz,  $\text{CD}_2\text{Cl}_2$ ) of **8b**

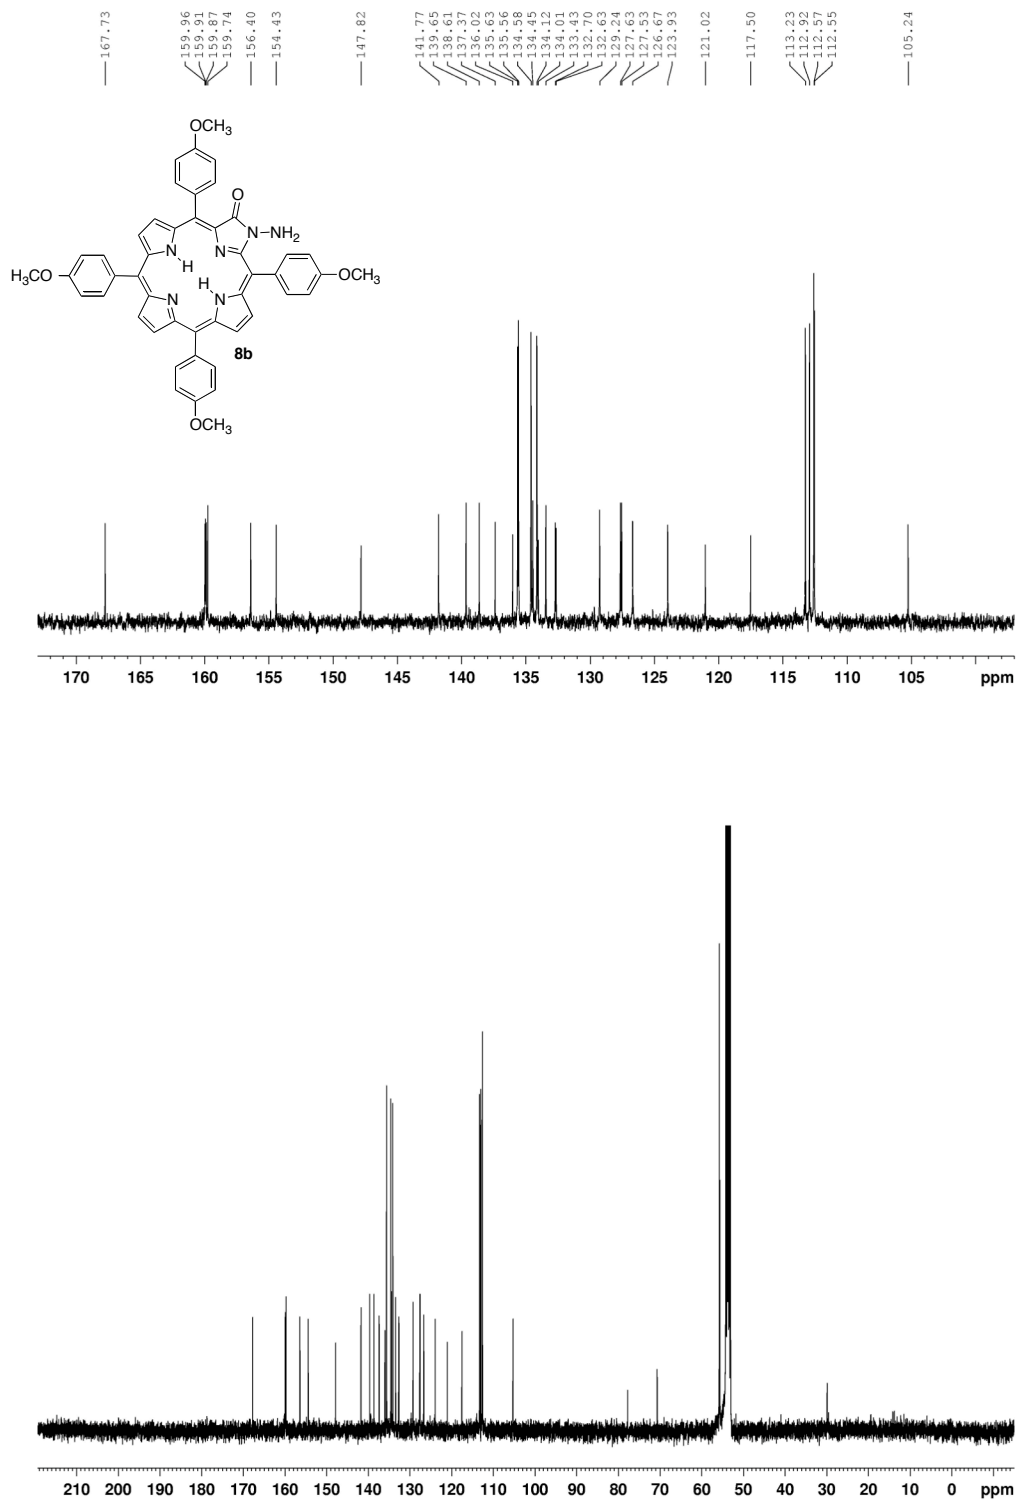

Figure 11.  $^{13}\text{C}$  NMR Spectrum (100 MHz,  $\text{CD}_2\text{Cl}_2$ ,  $D_1 = 5\text{s}$ ) of **8b**

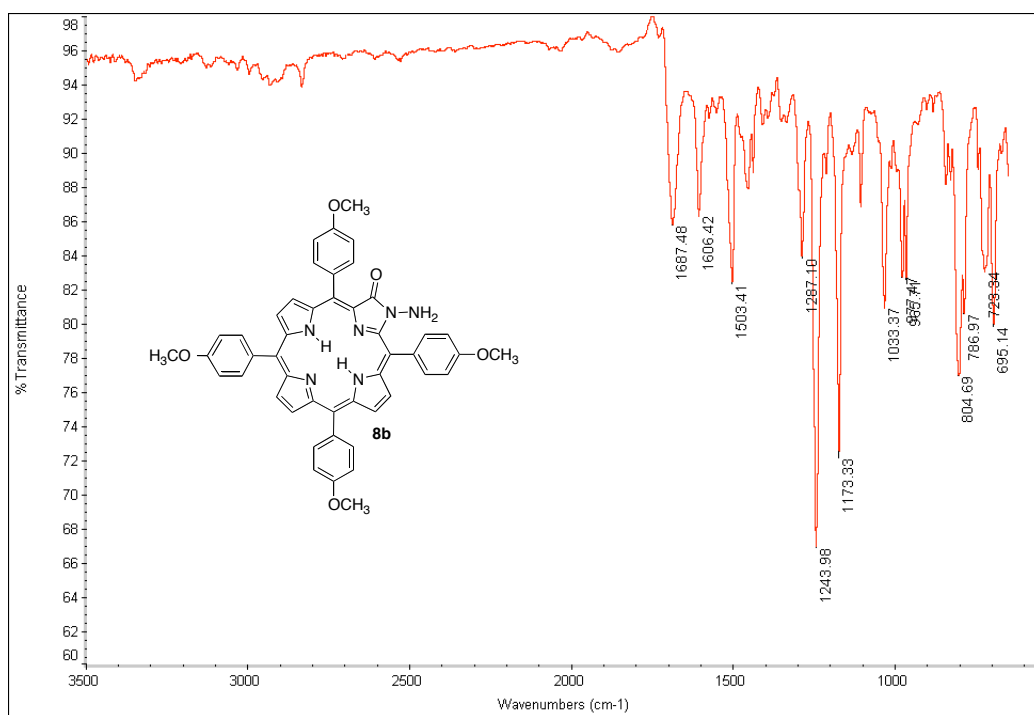

**Figure 12.** FT-IR Spectrum (neat, diffuse reflectance) of **8b**

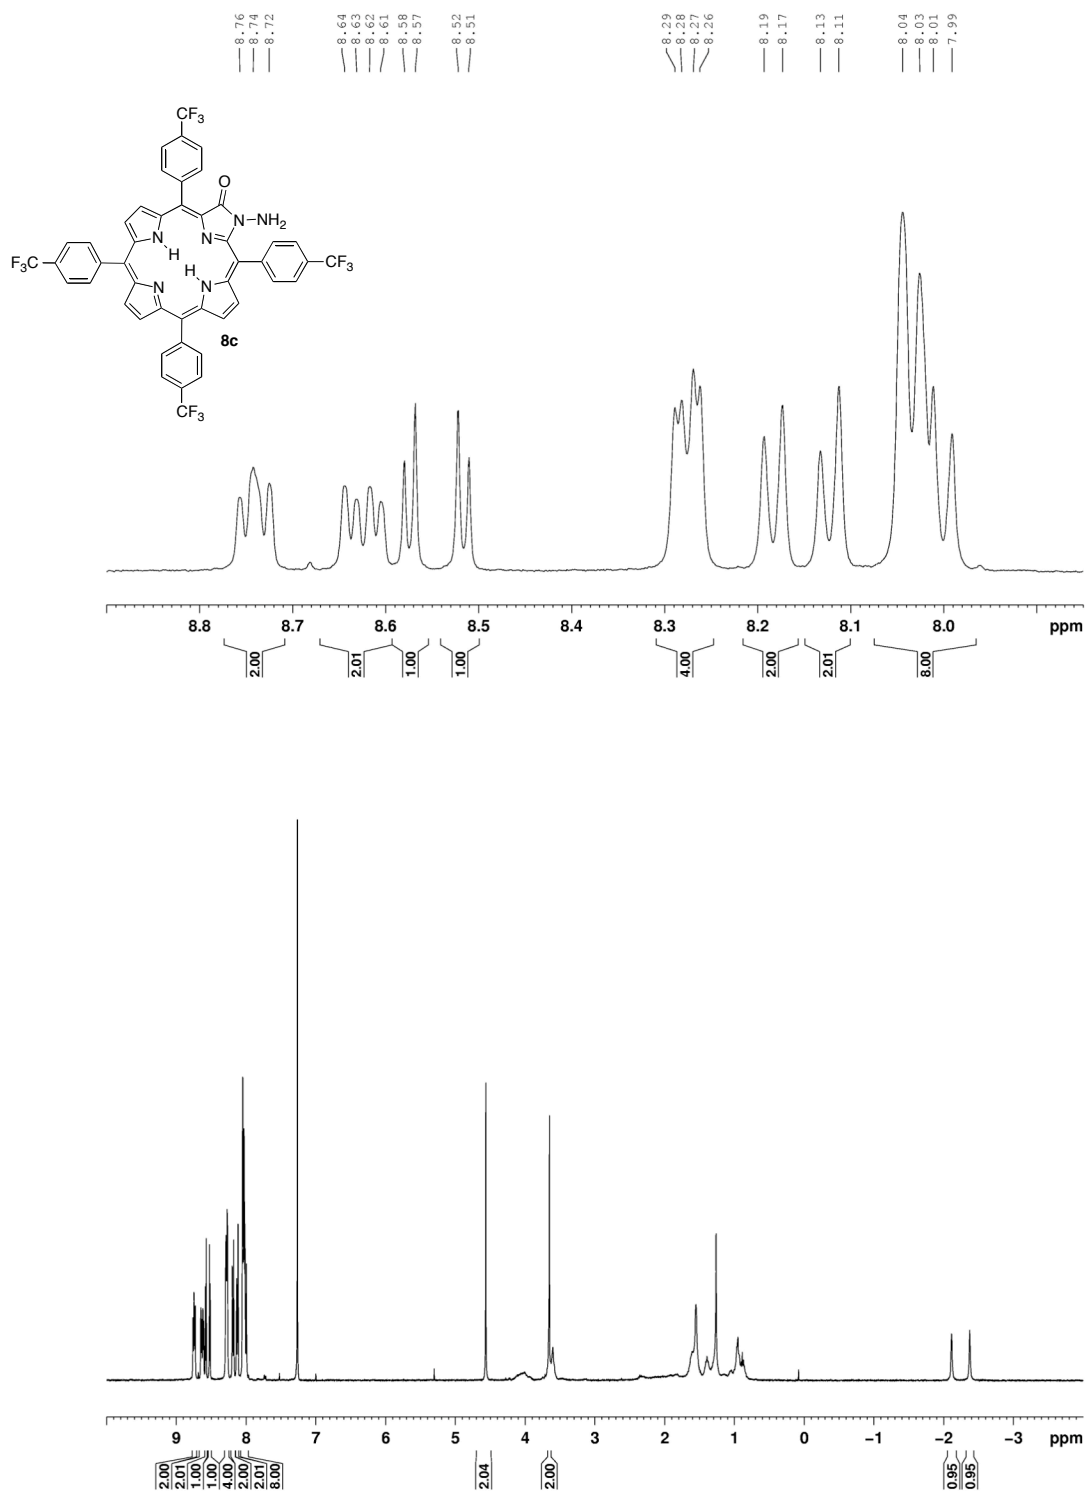

**Figure 13.** <sup>1</sup>H NMR Spectrum (400 MHz, CDCl<sub>3</sub>) of **8c**

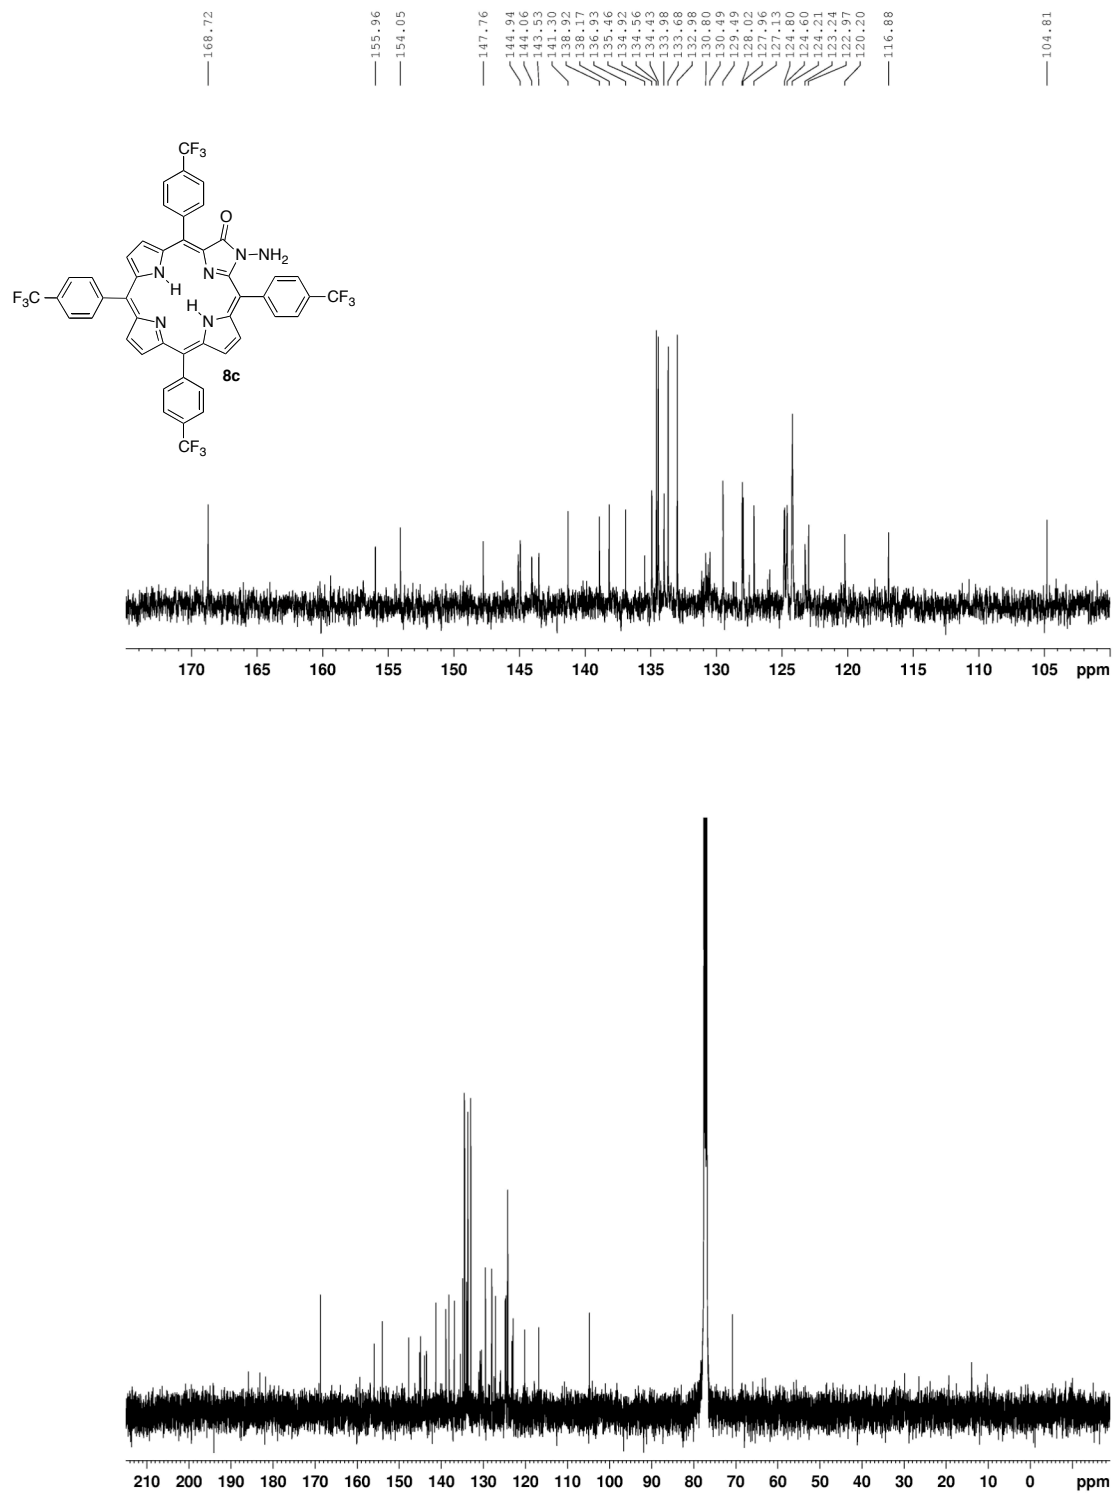

**Figure 14.**  $^{13}\text{C}$  NMR Spectrum (100 MHz,  $\text{CDCl}_3$ , D1 = 5s) of **8c**

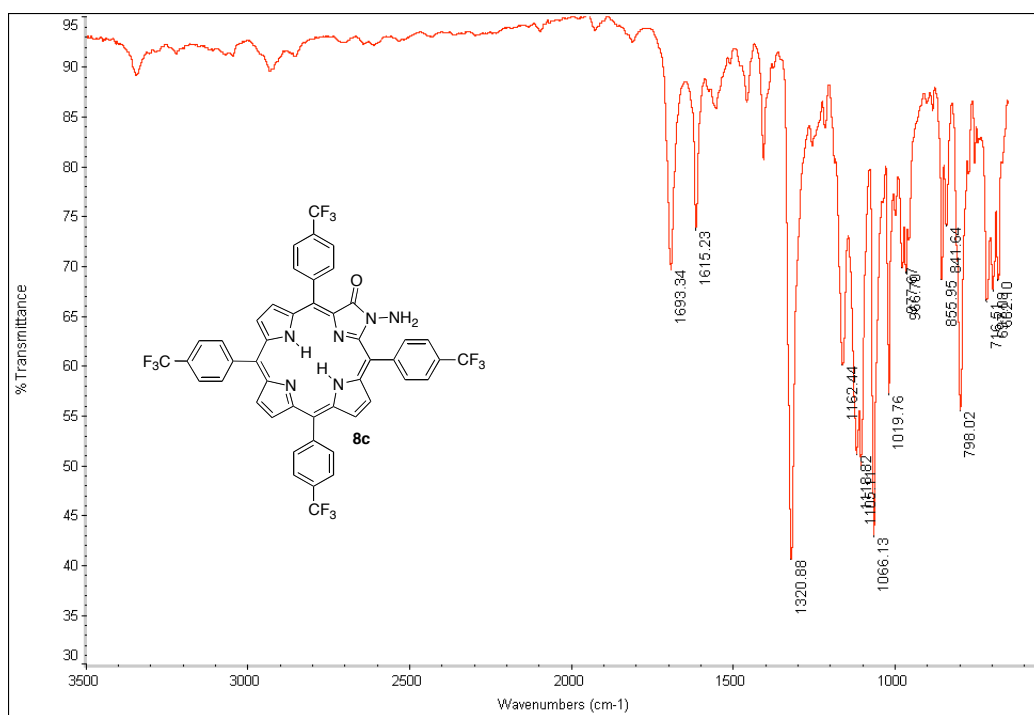

**Figure 15.** FT-IR Spectrum (neat, diffuse reflectance) of **8c**

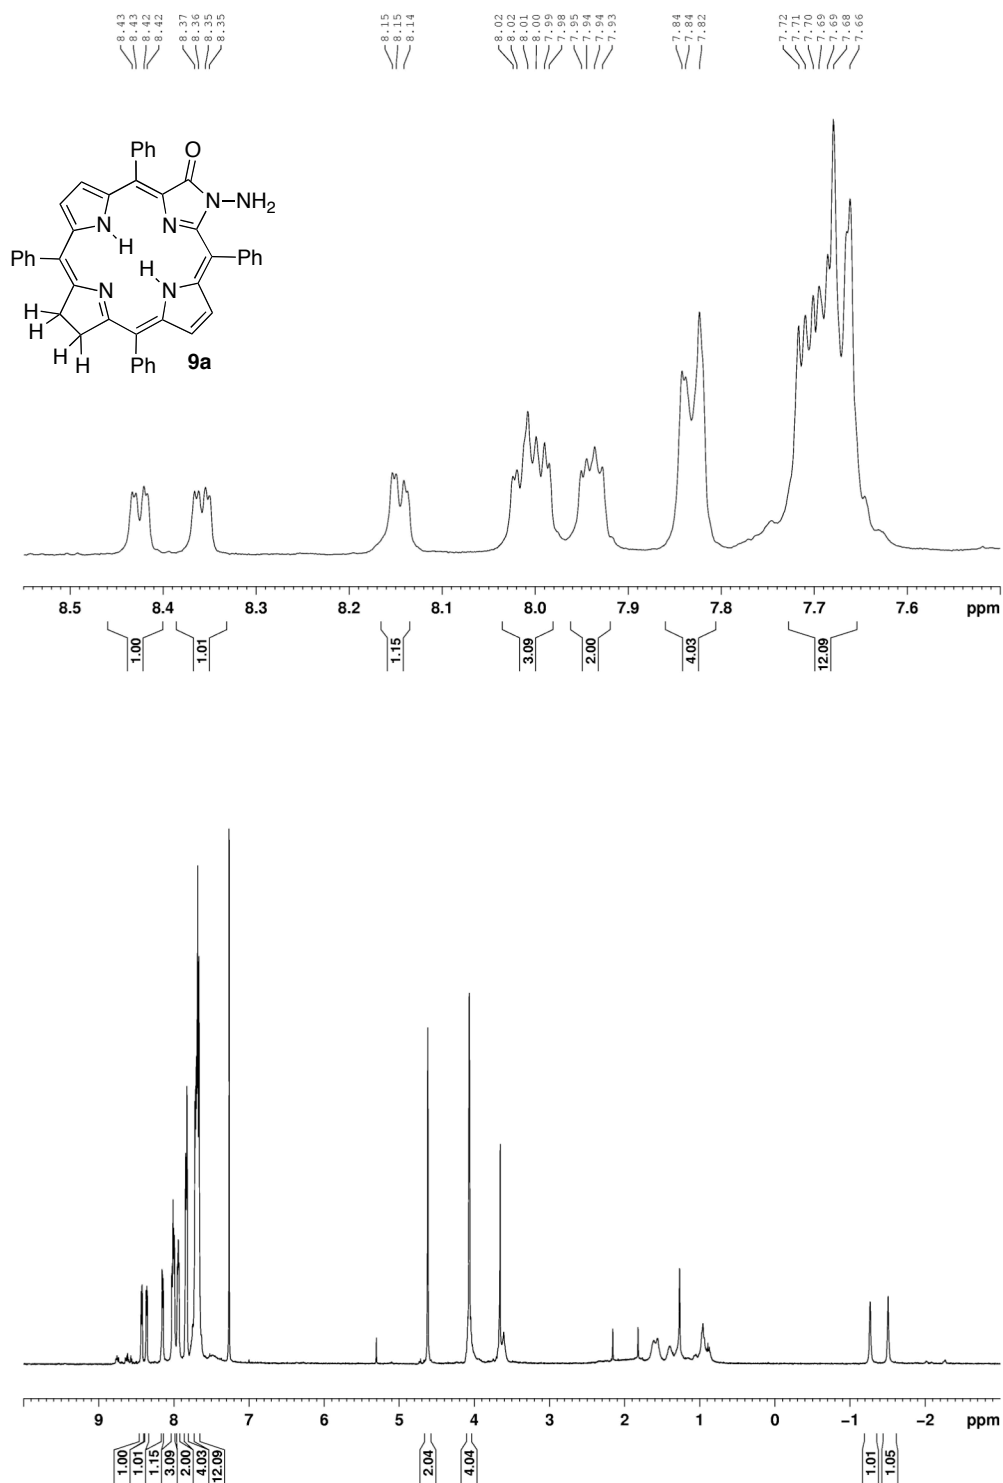

Figure 16. <sup>1</sup>H NMR Spectrum (400 MHz, CDCl<sub>3</sub>) of **9a**

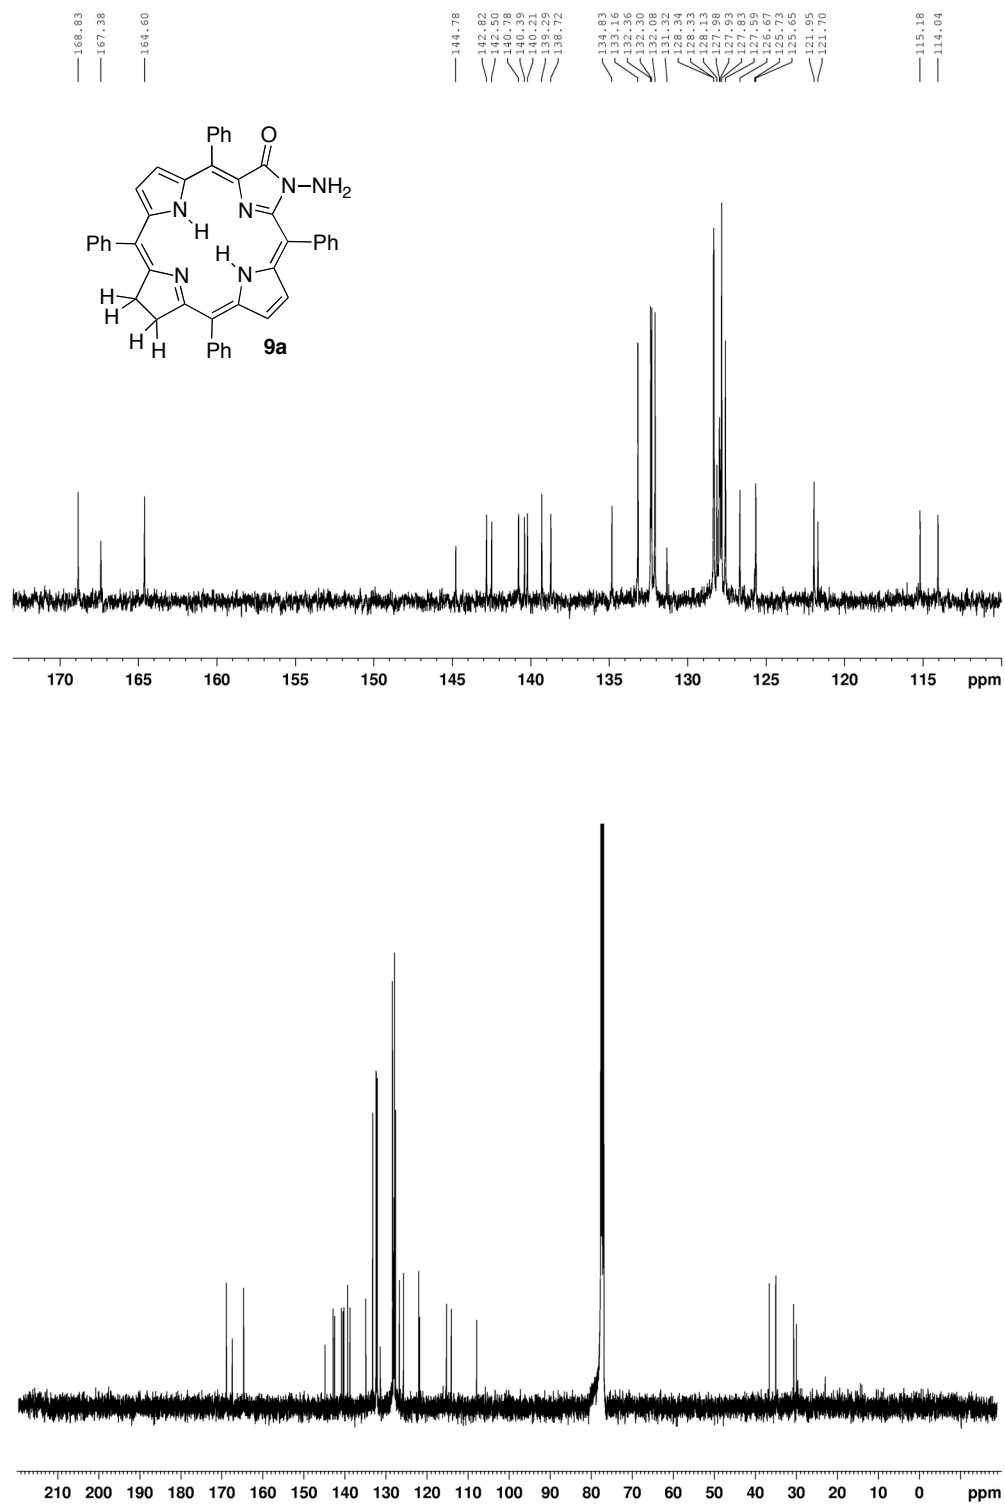

Figure 17. <sup>13</sup>C NMR Spectrum (100 MHz, CDCl<sub>3</sub>, D1 = 3s) of **9a**



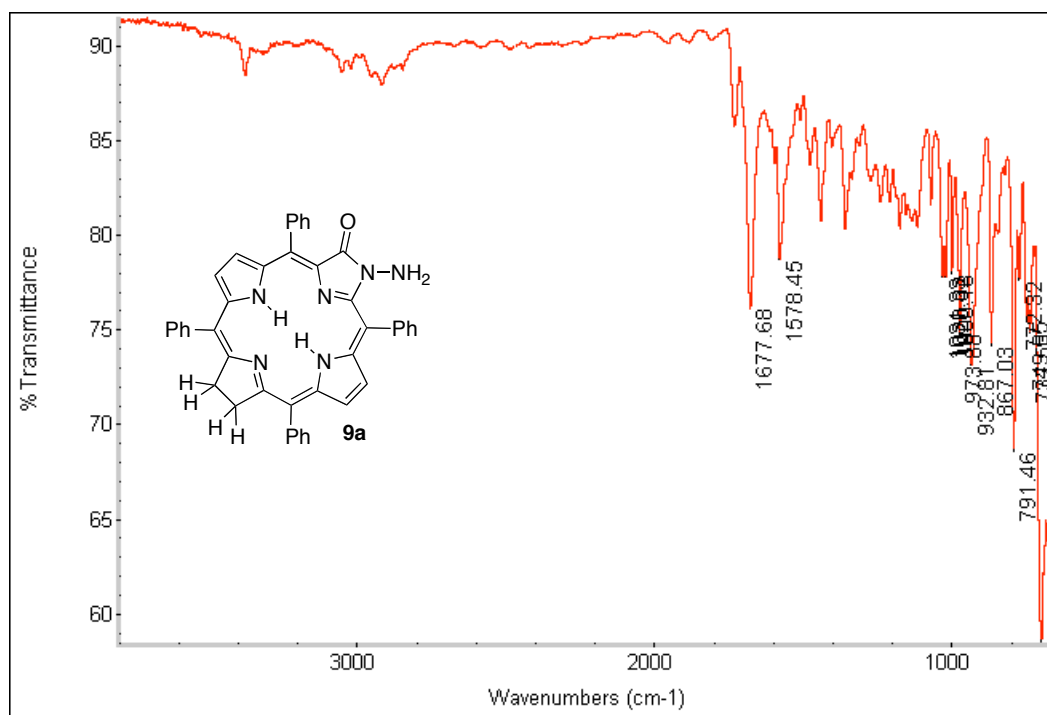

**Figure 18.** FT-IR Spectrum (neat, diffuse reflectance) of **9a**



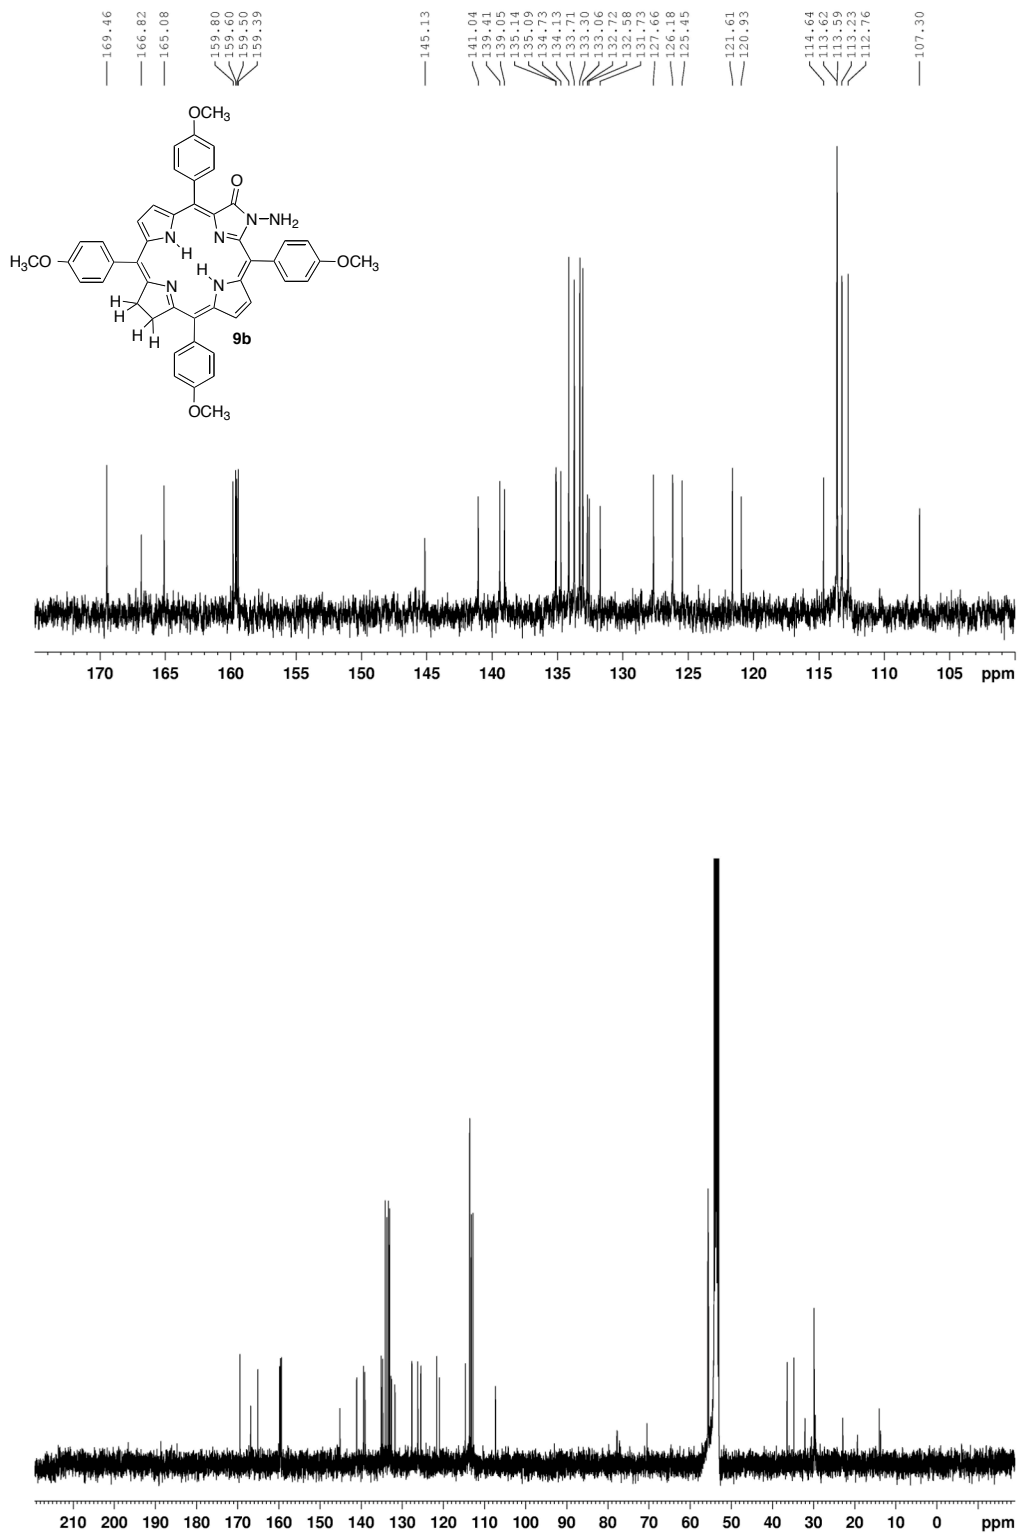

**Figure 20.** <sup>13</sup>C NMR Spectrum (100 MHz, CD<sub>2</sub>Cl<sub>2</sub>, D1 = 5s) of **9b**

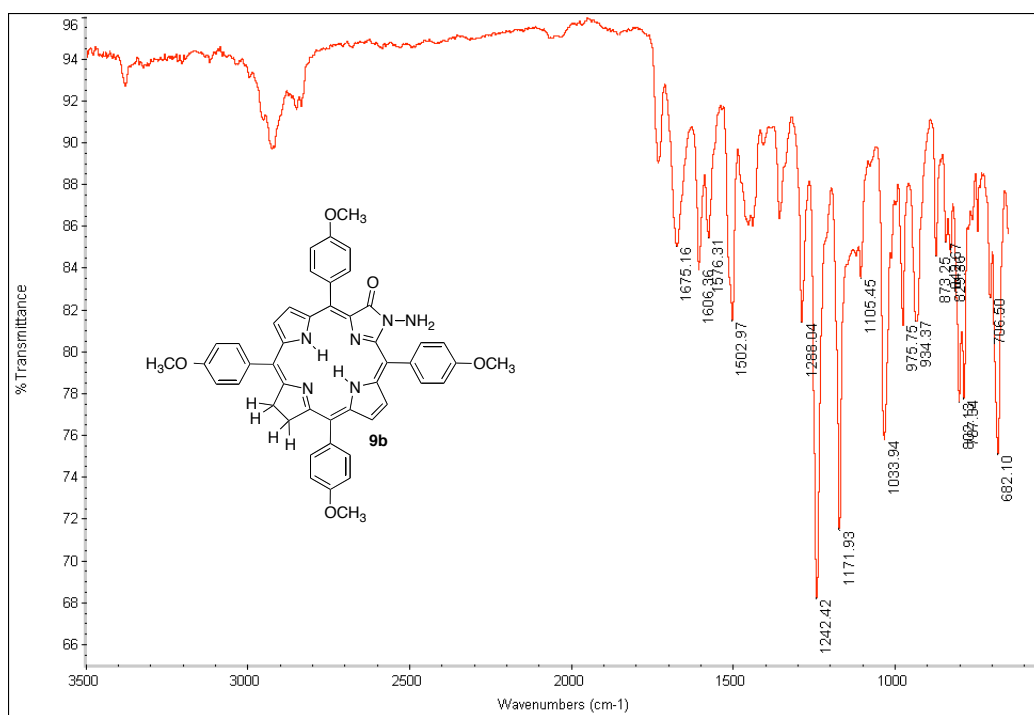

**Figure 21.** FT-IR Spectrum (neat, diffuse reflectance) of **9b**

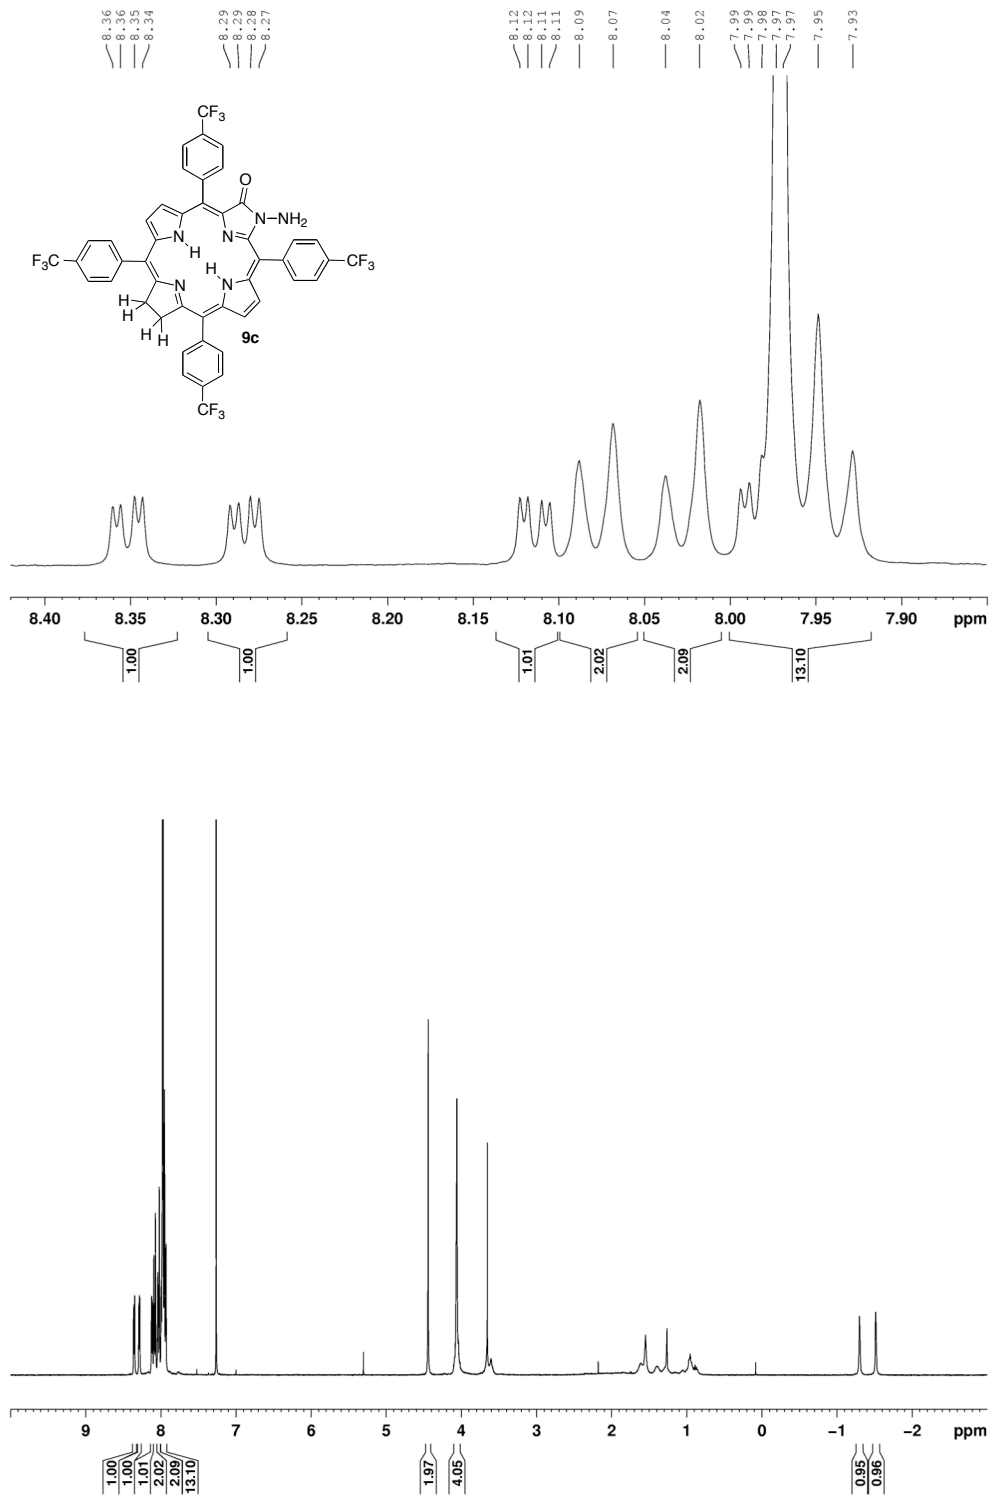

Figure 22.  $^1\text{H}$  NMR Spectrum (400 MHz,  $\text{CDCl}_3$ ) of **9c**

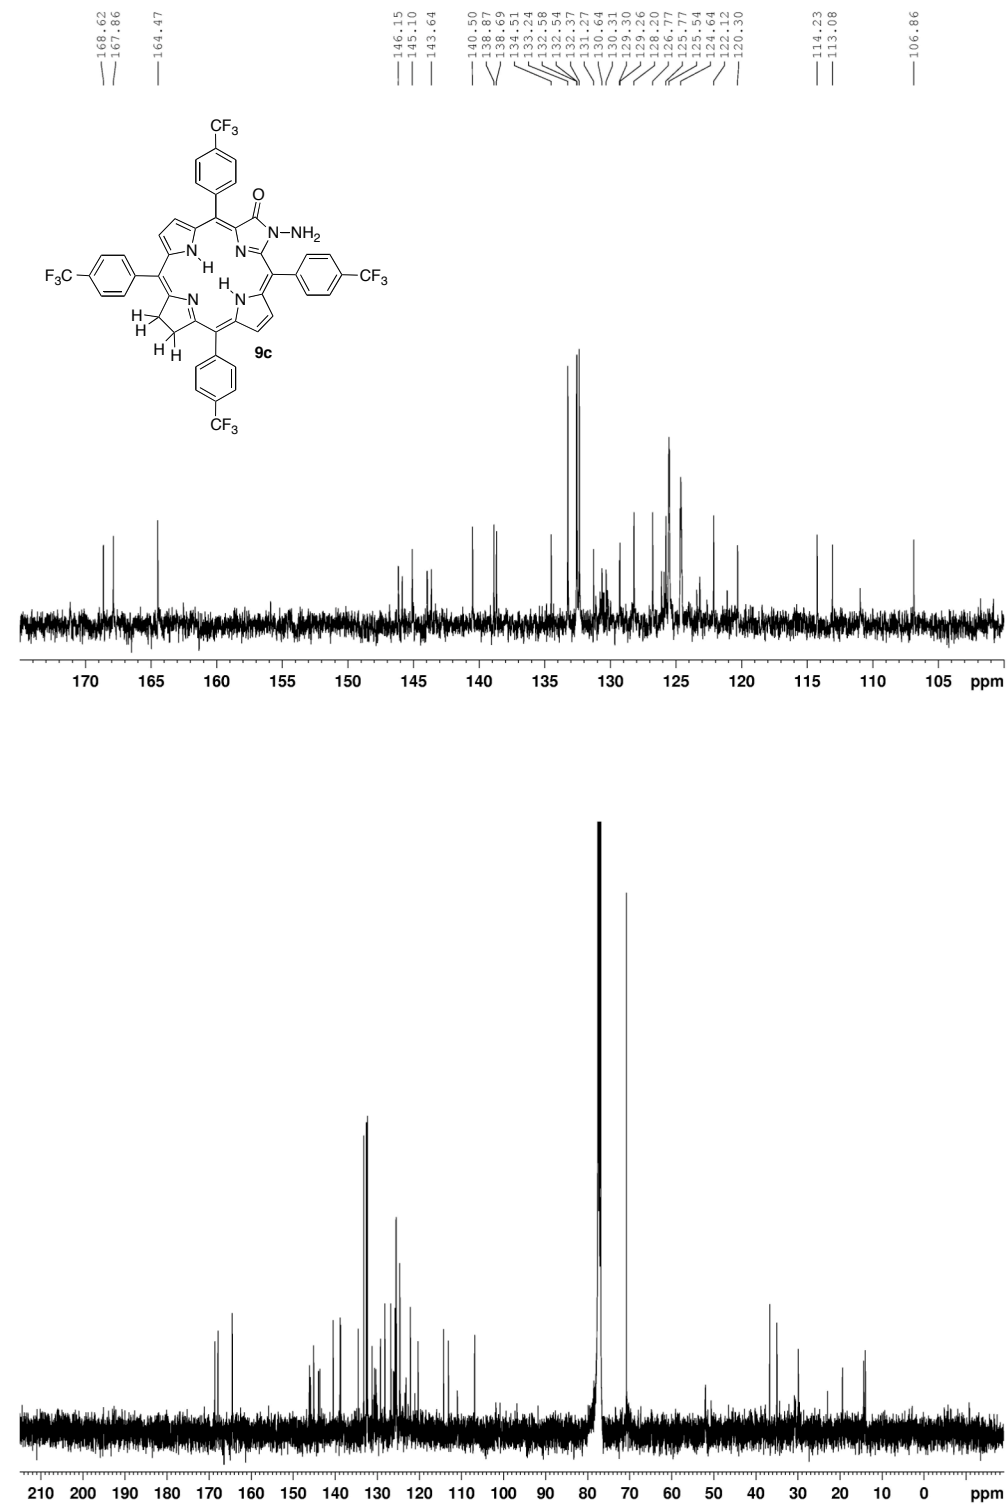

**Figure 23.**  $^{13}\text{C}$  NMR Spectrum (100 MHz,  $\text{CDCl}_3$ , D1 = 5s) of **9c**

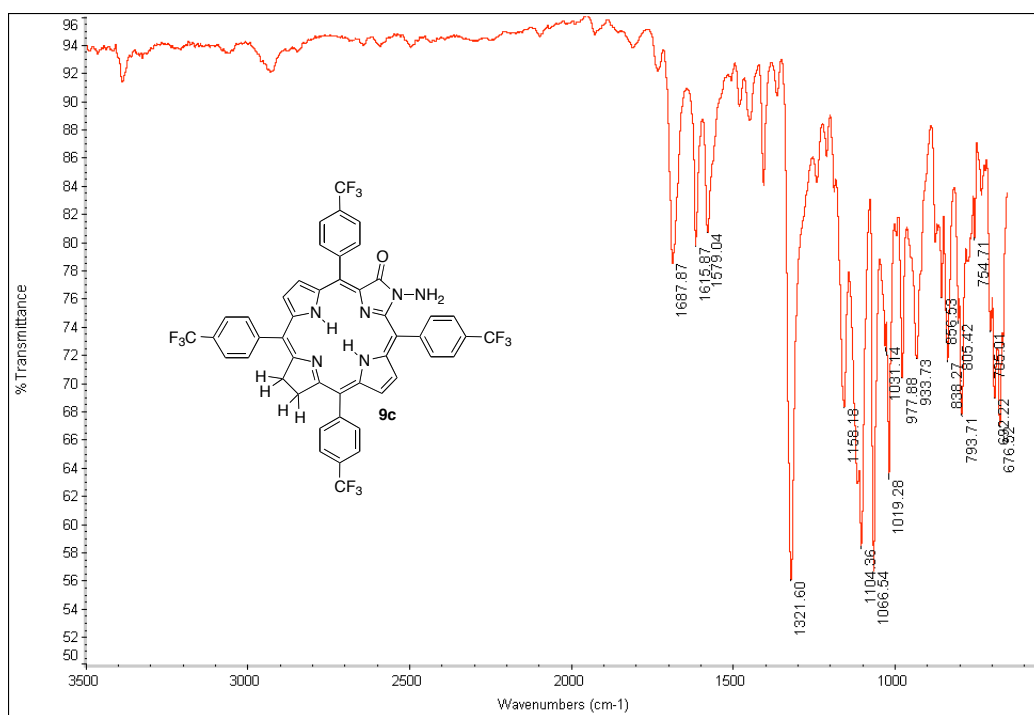

**Figure 24.** FT-IR Spectrum (neat, diffuse reflectance) of **9c**

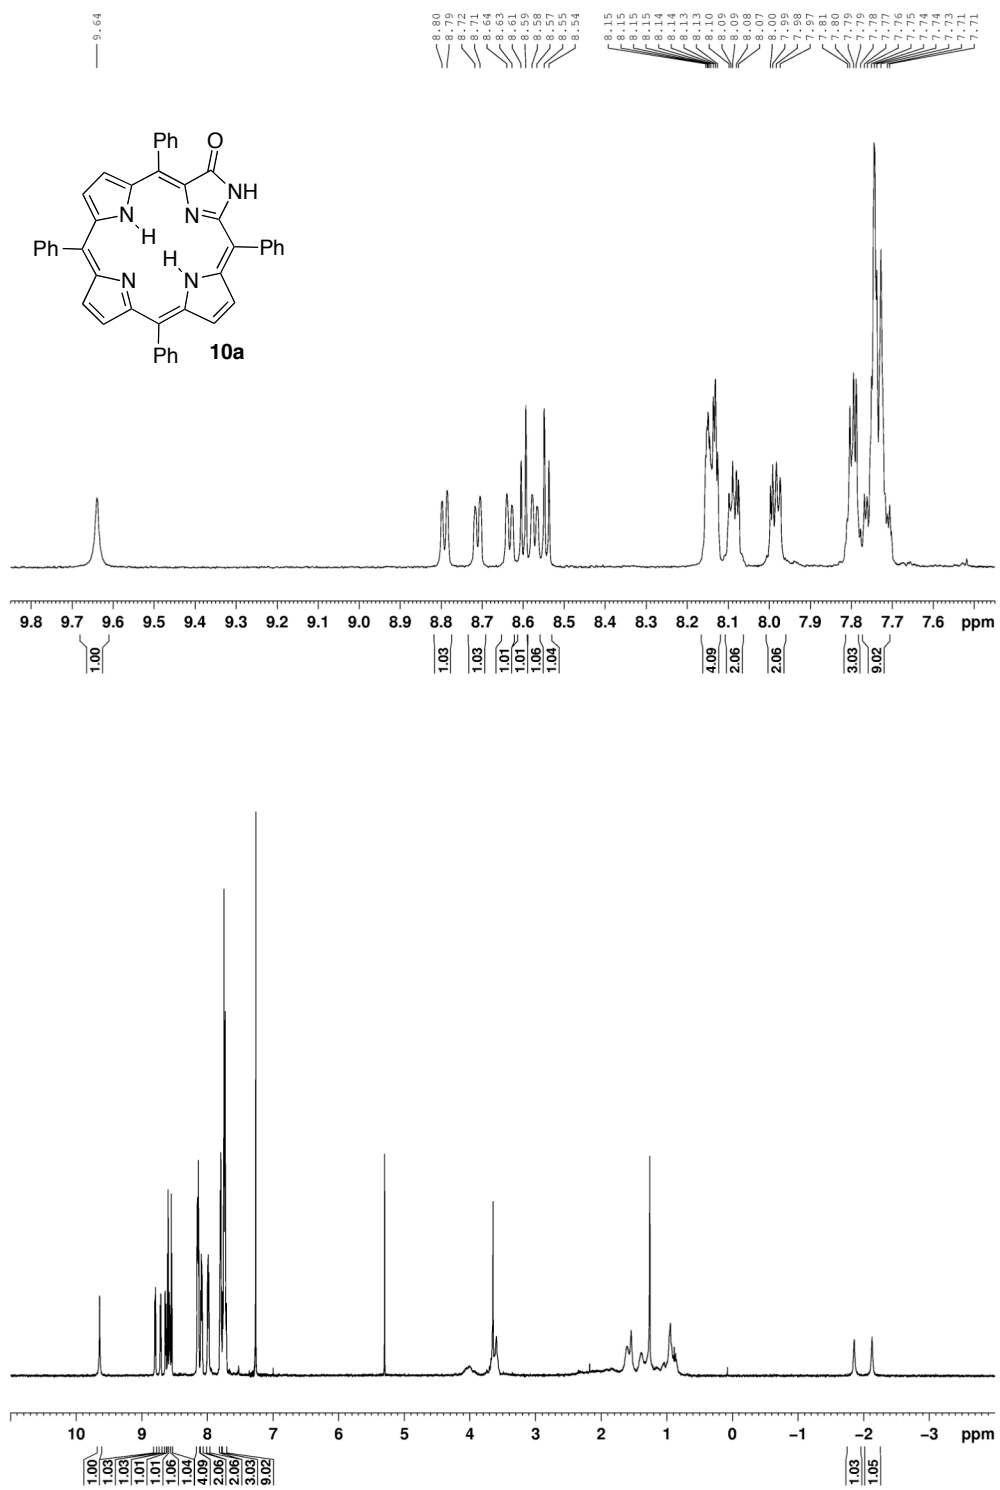

**Figure 25.**  $^1\text{H}$  NMR Spectrum (400 MHz,  $\text{CDCl}_3$ ) of **10a**



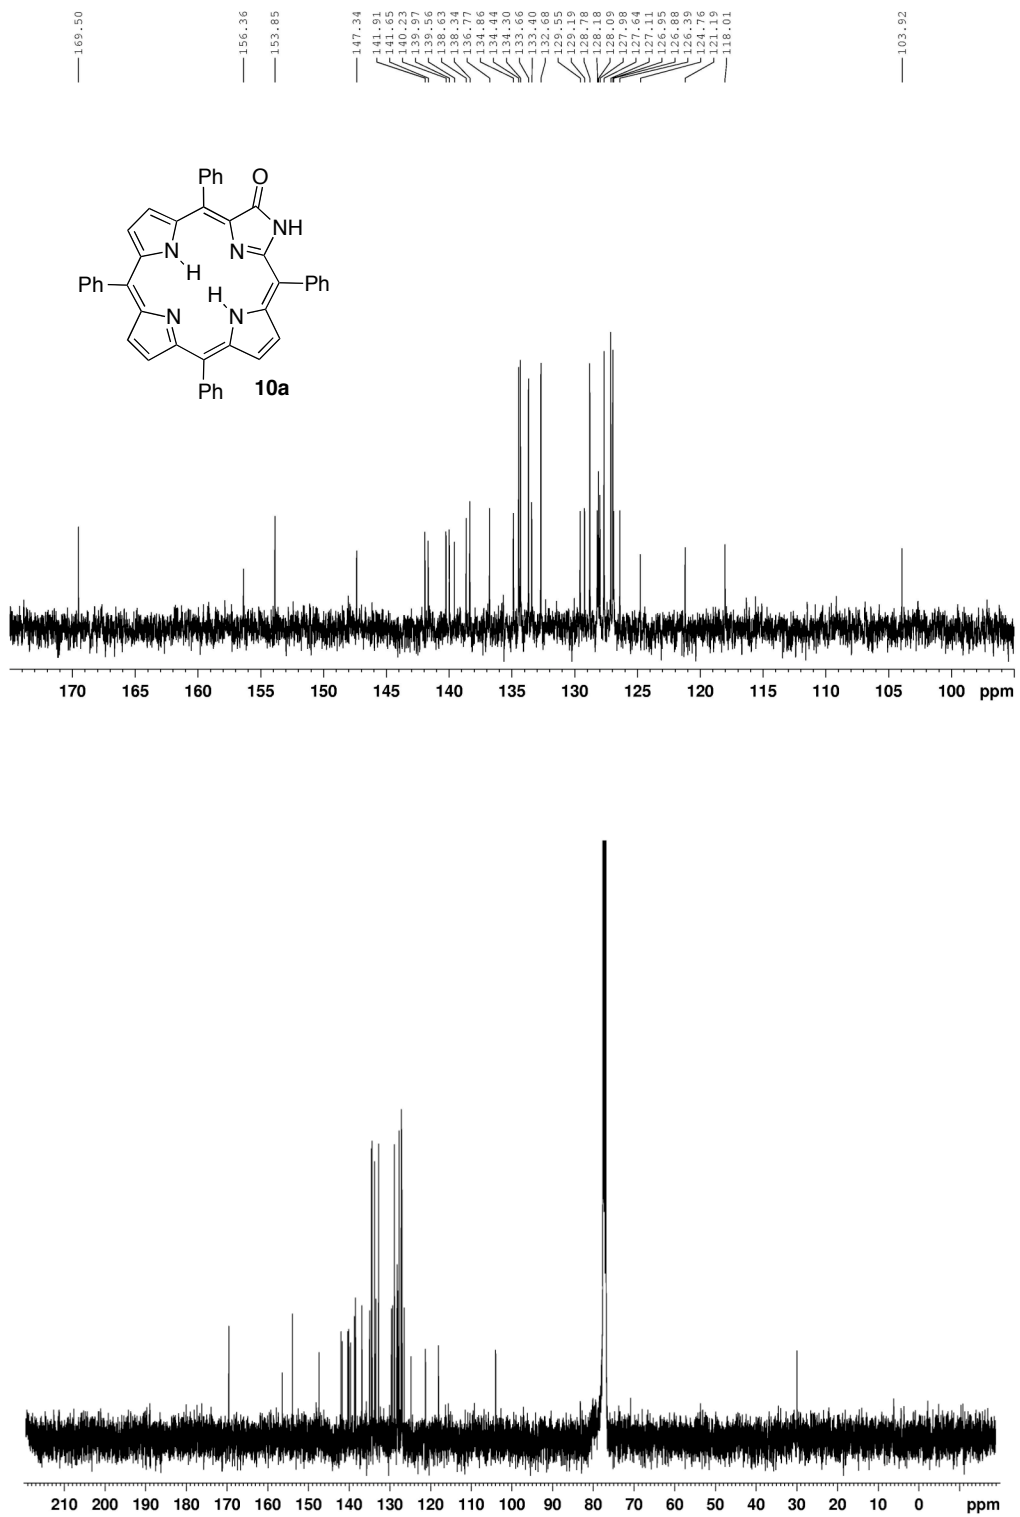

Figure 26. <sup>13</sup>C NMR Spectrum (100 MHz, CDCl<sub>3</sub>, D1 = 3s) of **10a**

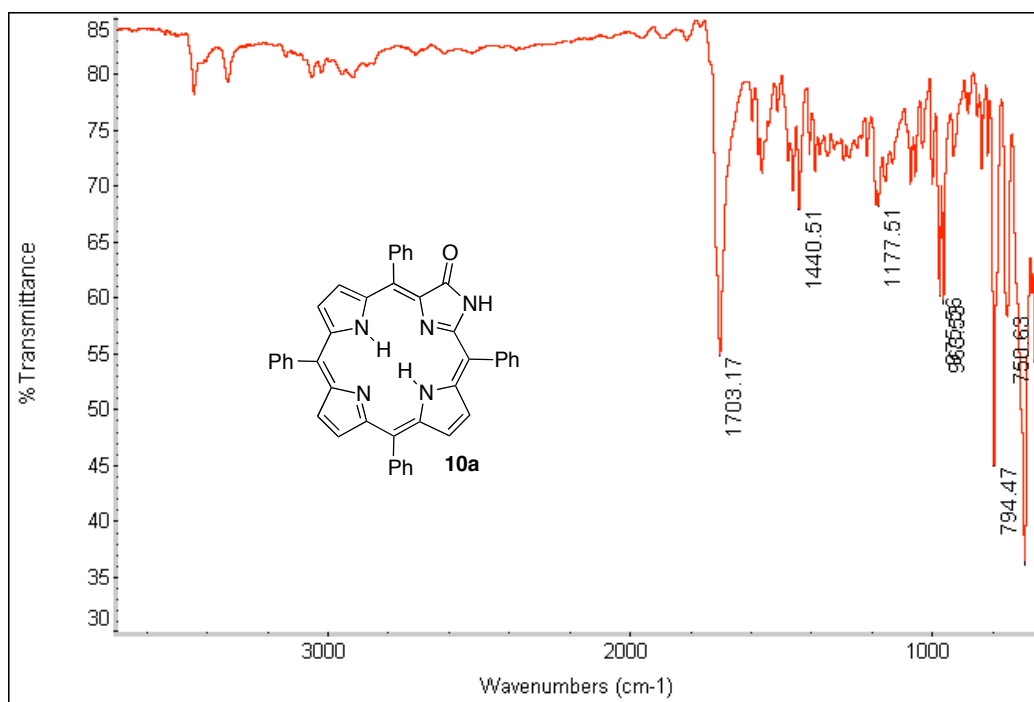

**Figure 27.** FT-IR Spectrum (neat, diffuse reflectance) of **10a**



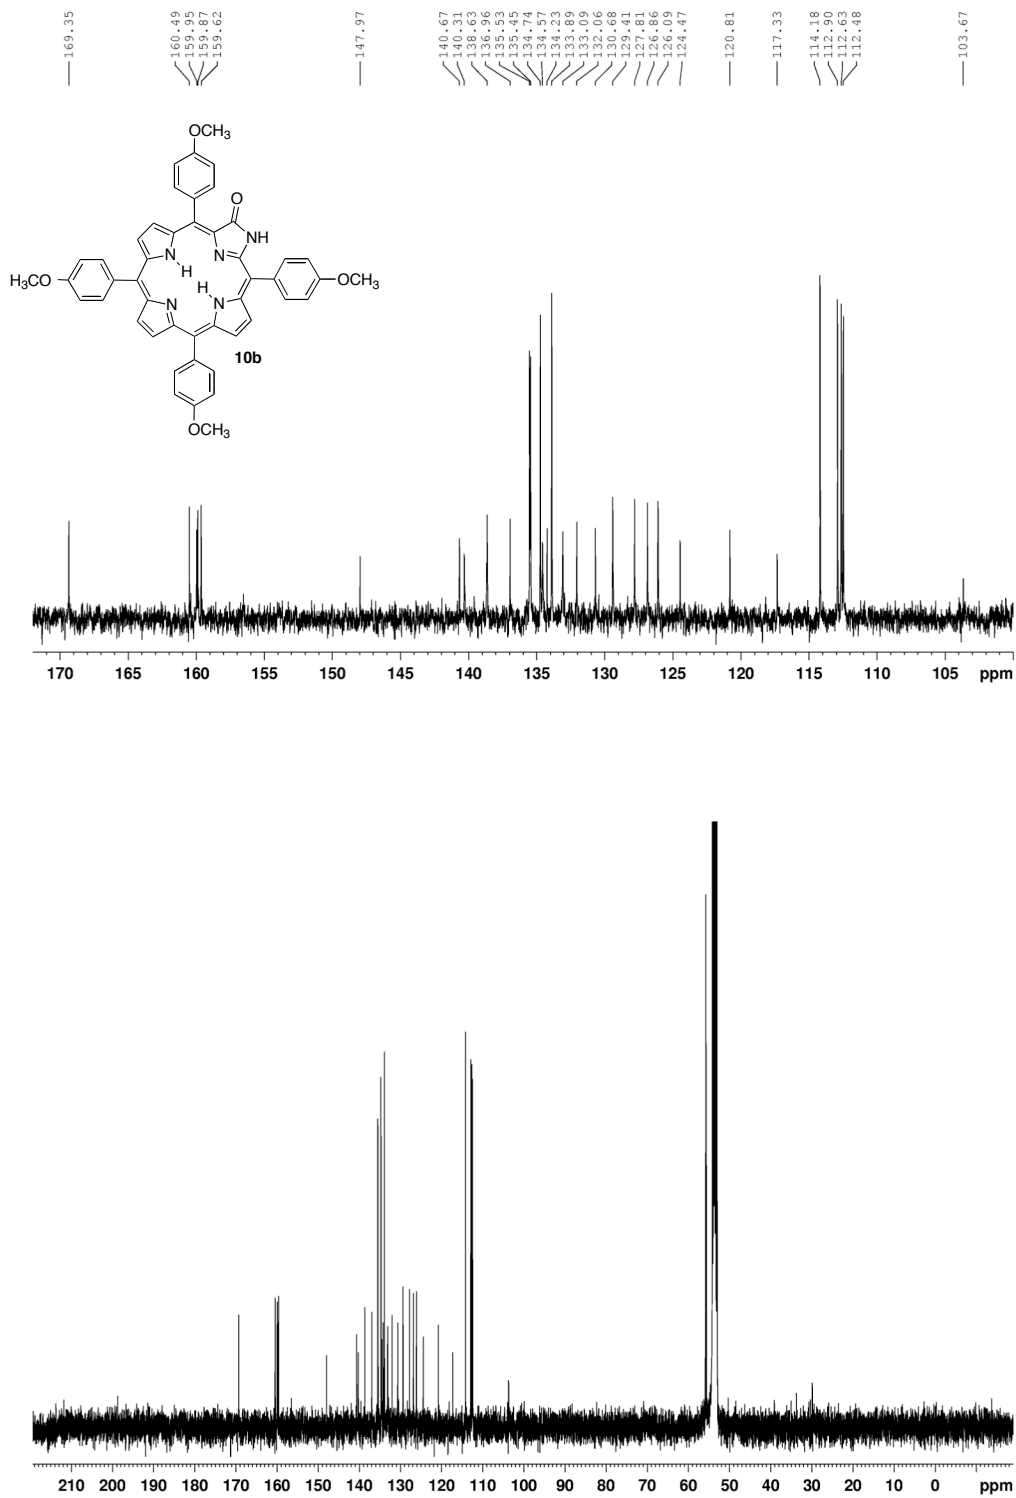

**Figure 29.**  $^{13}\text{C}$  NMR Spectrum (100 MHz,  $\text{CD}_2\text{Cl}_2$ ) of **10b**

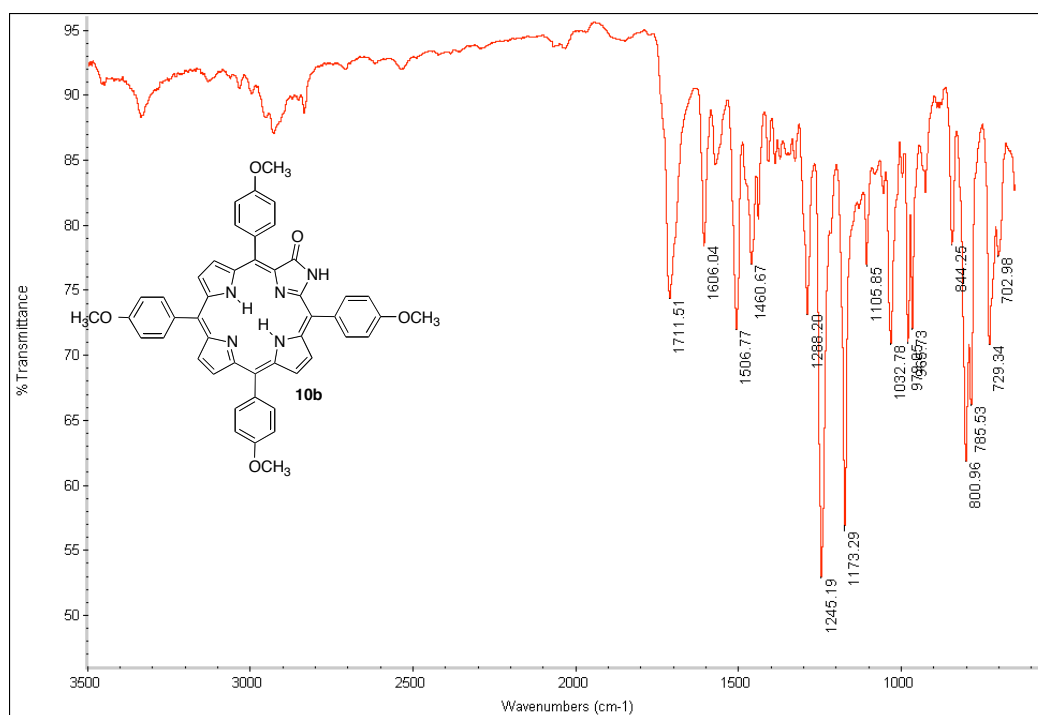

**Figure 30.** FT-IR Spectrum (neat, diffuse reflectance) of **10b**

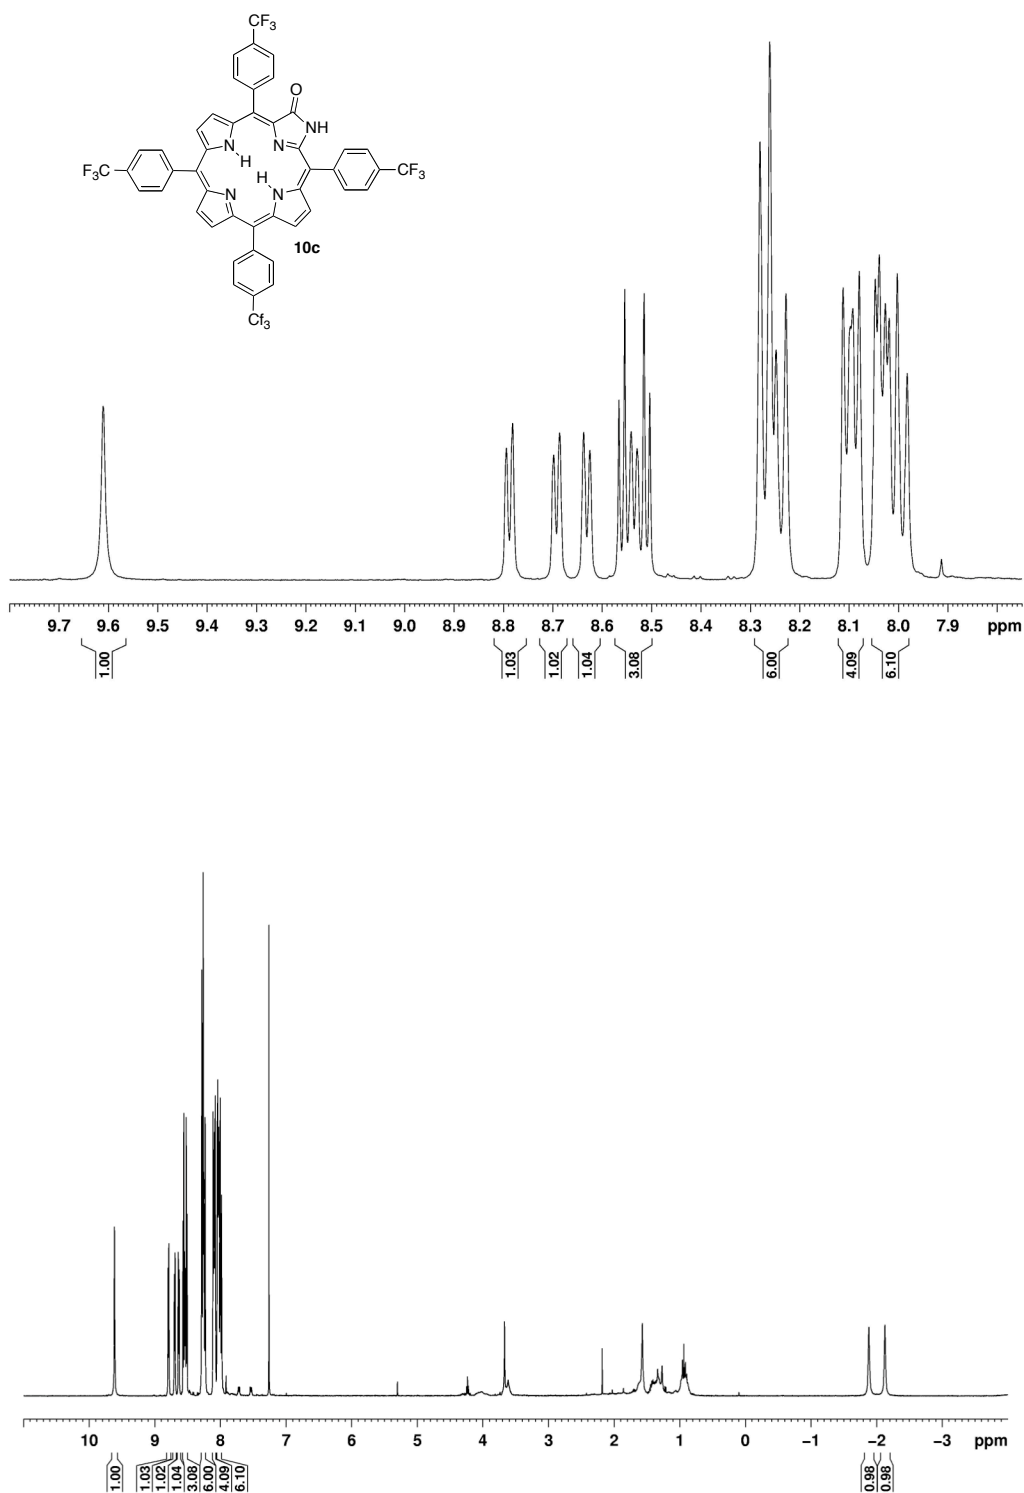

**Figure 31.**  $^1\text{H}$  NMR Spectrum (400 MHz,  $\text{CDCl}_3$ ) of **10c**

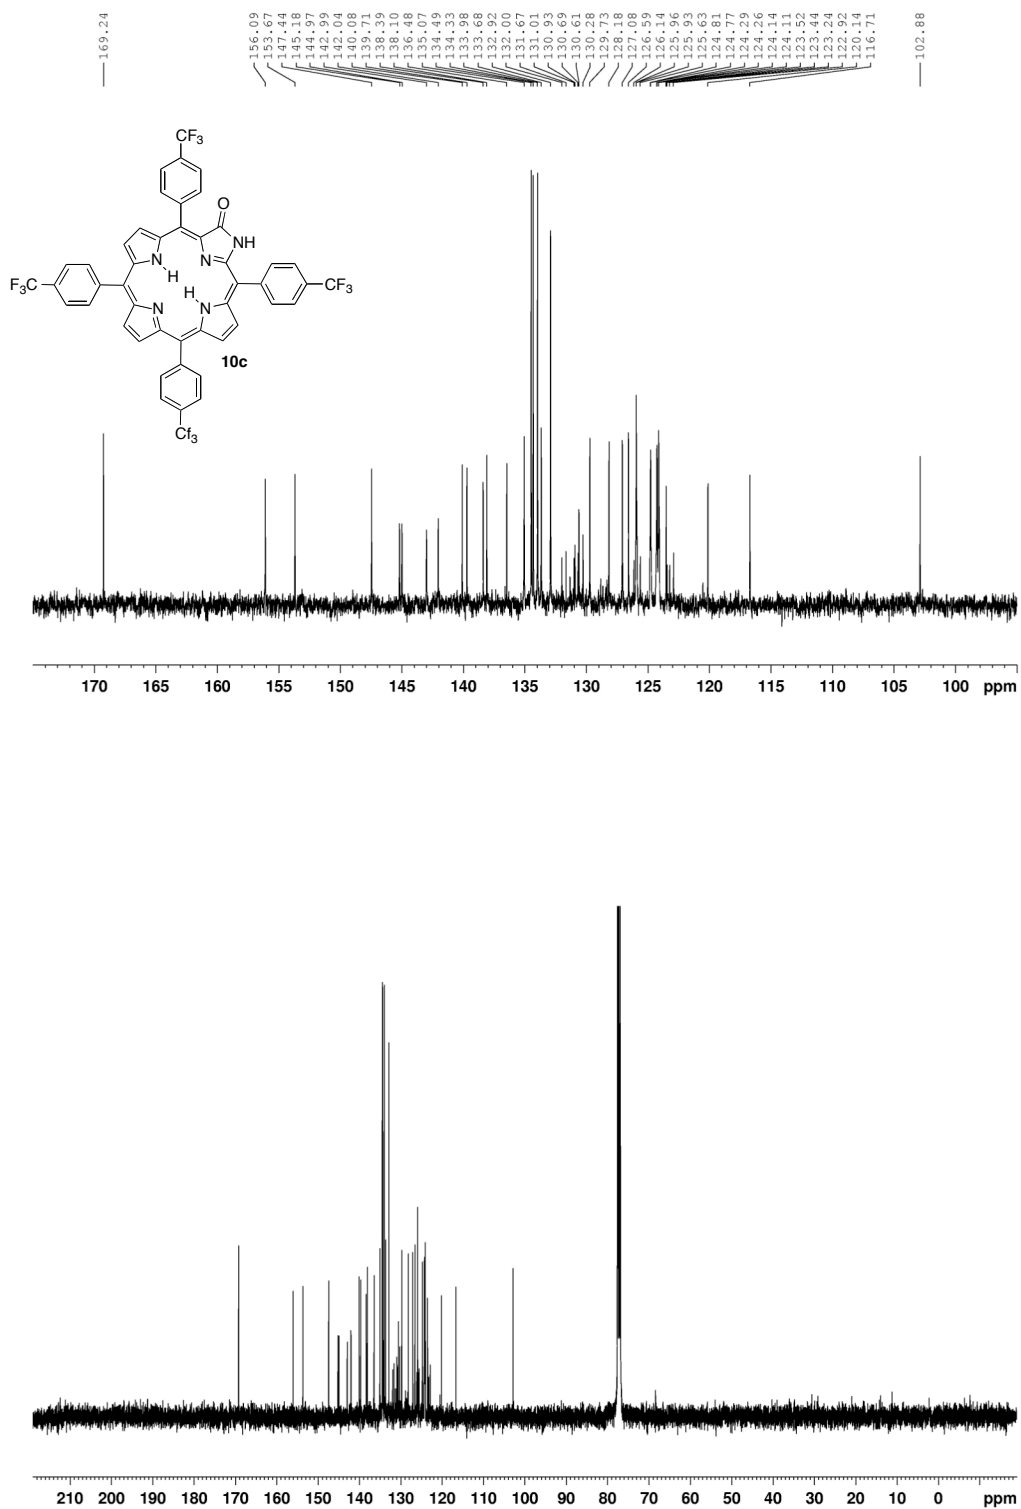

**Figure 32.** <sup>13</sup>C NMR Spectrum (100 MHz, CDCl<sub>3</sub>, D1 = 3s) of **10c**

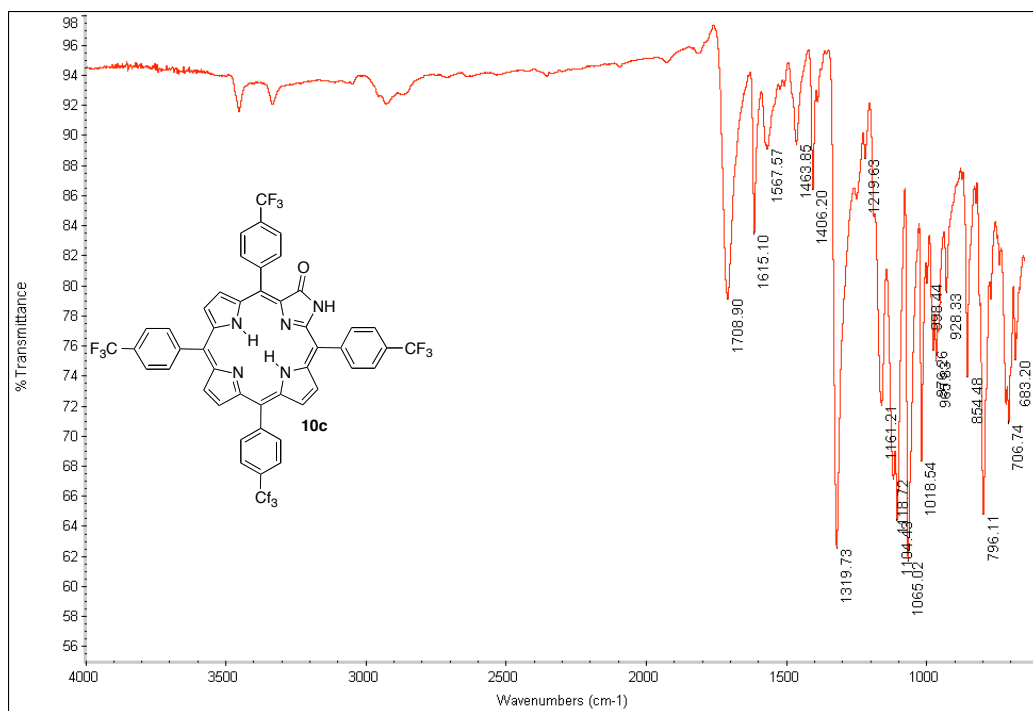

**Figure 33.** FT-IR Spectrum (neat, diffuse reflectance) of **10c**





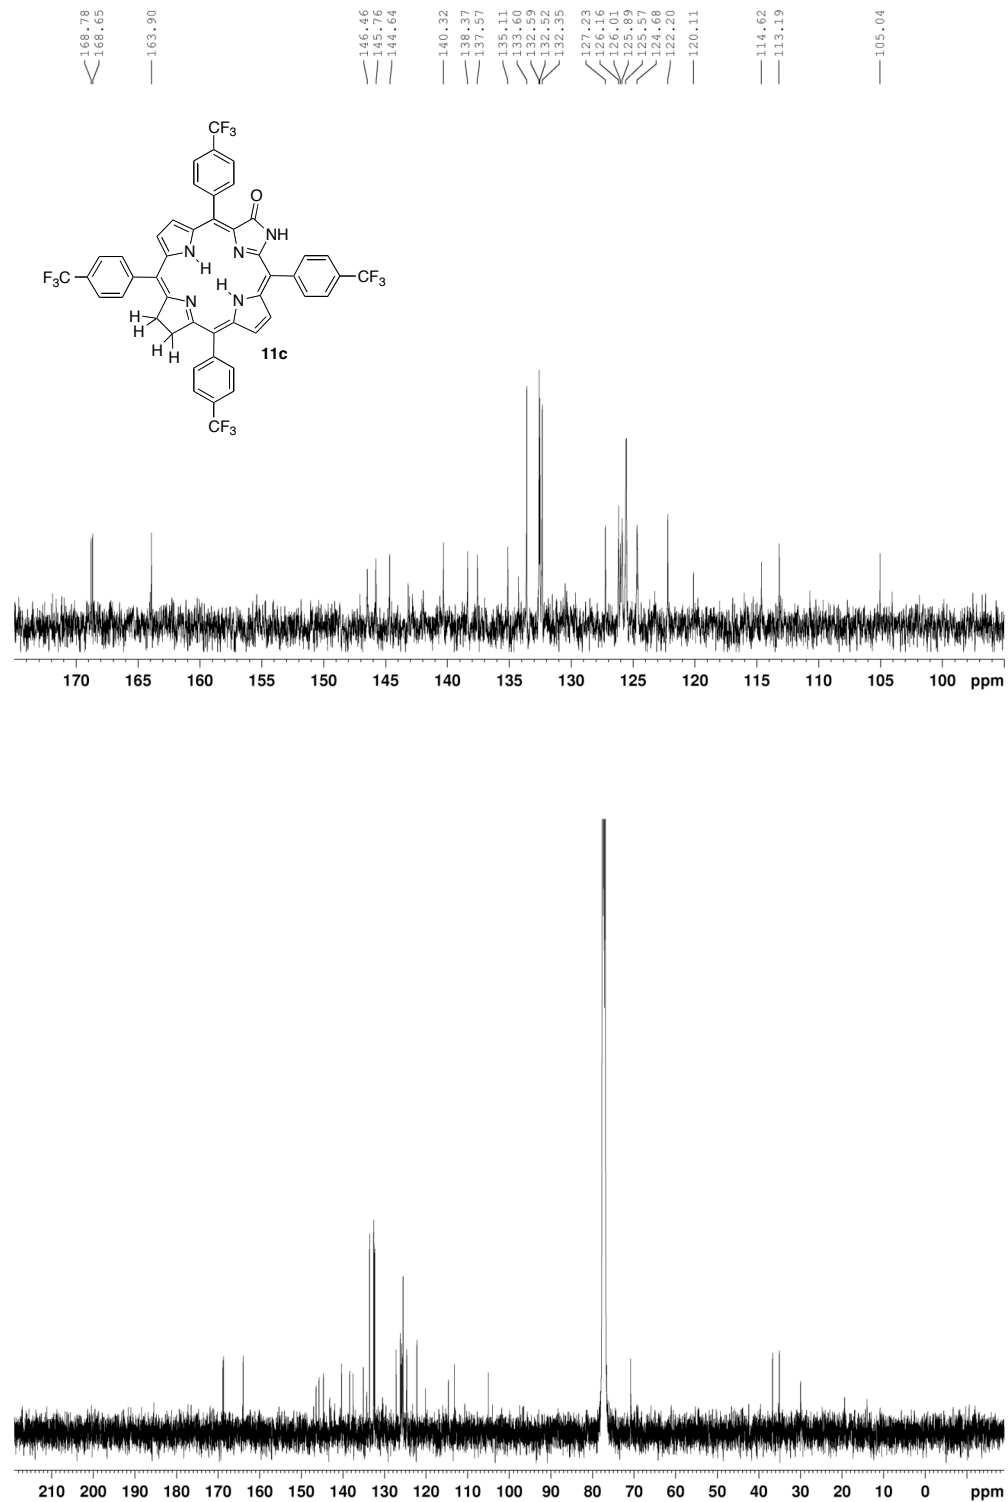

**Figure 35.**  $^{13}\text{C}$  NMR Spectrum (100 MHz,  $\text{CDCl}_3$ , D1 = 3s) of **11c**

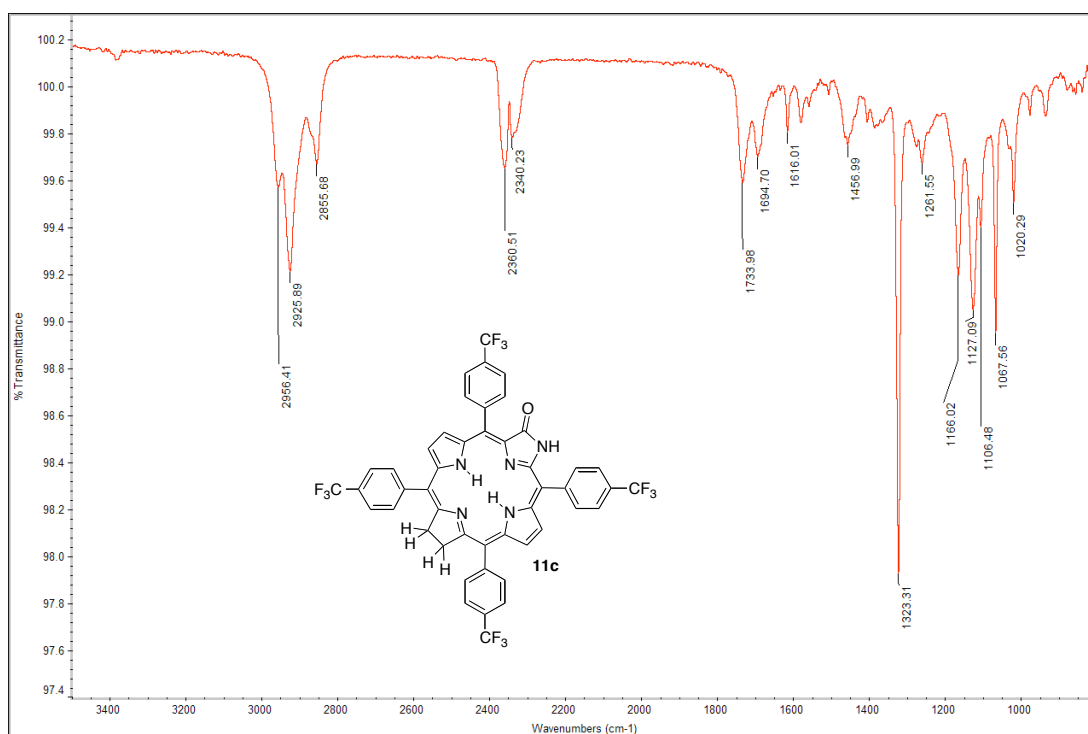

**Figure 36** FT-IR Spectrum (neat, diffuse reflectance) of **11c**

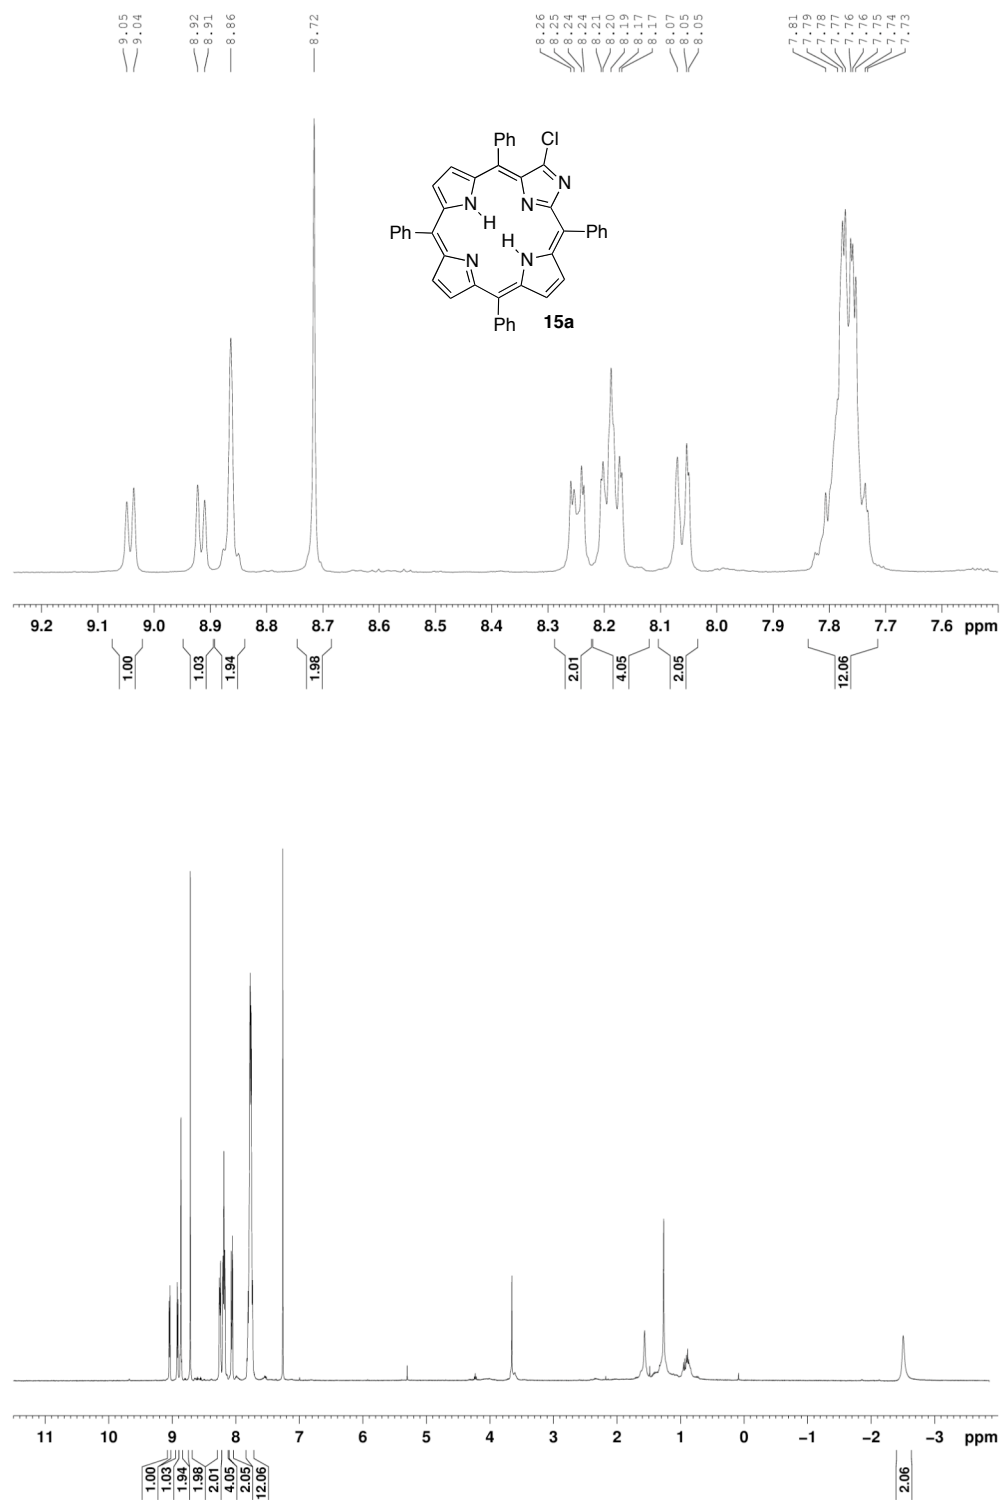

**Figure 37.** <sup>1</sup>H NMR Spectrum (400 MHz, CDCl<sub>3</sub>) of **15a**

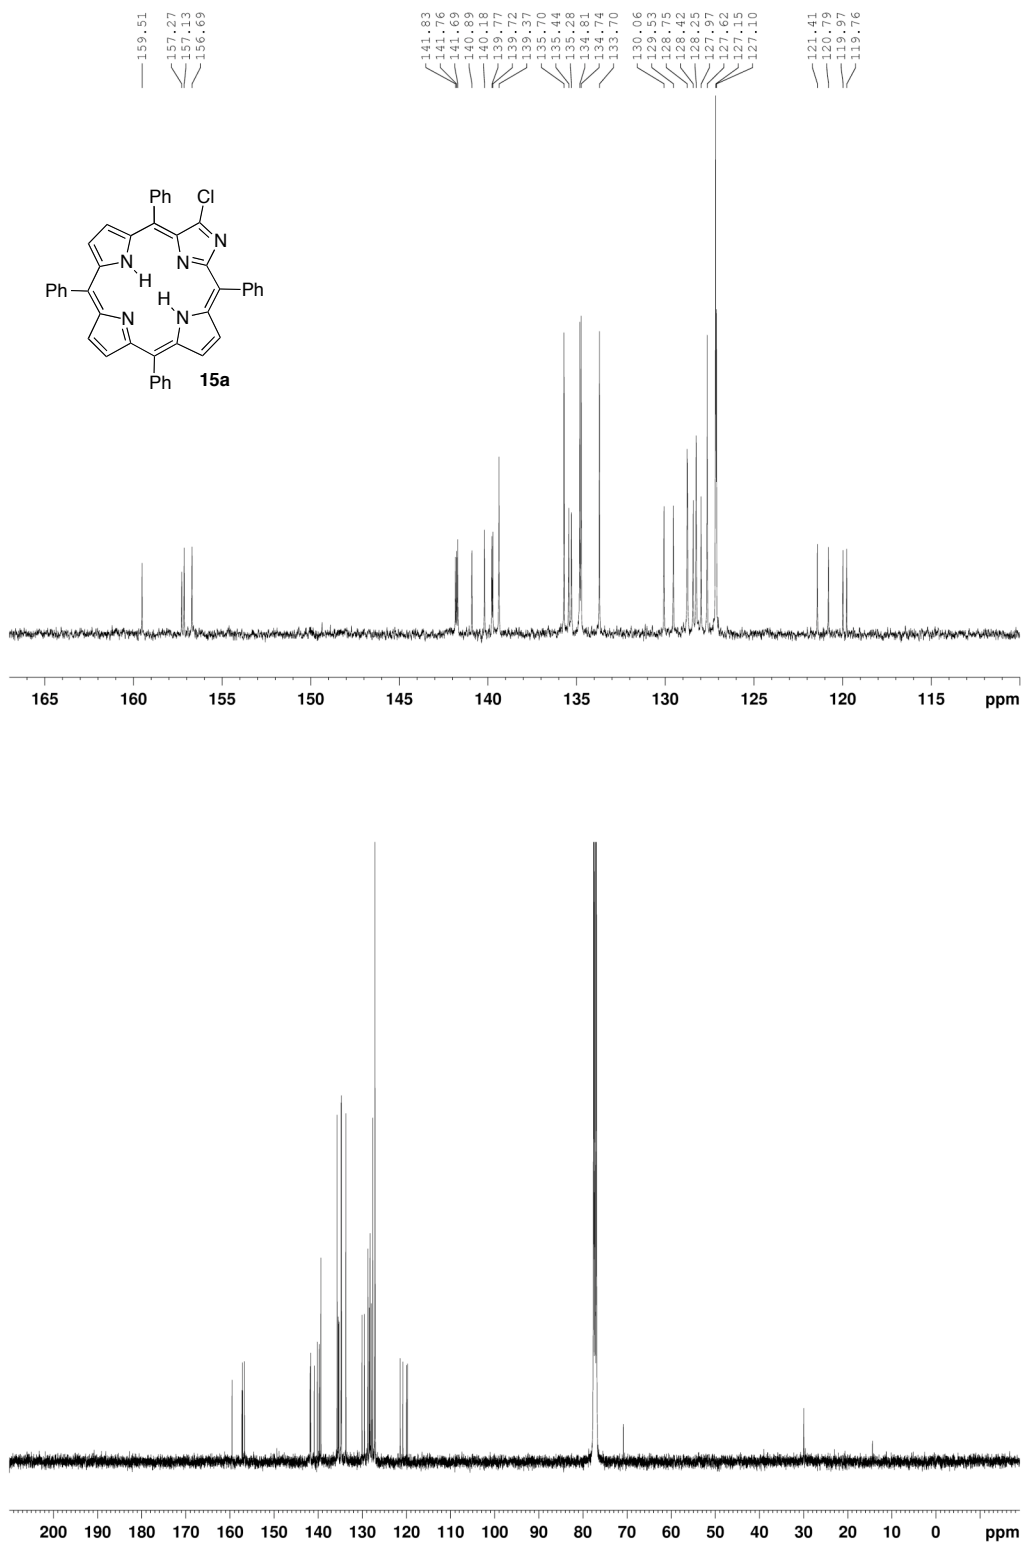

**Figure 38.**  $^{13}\text{C}$  NMR Spectrum (100 MHz,  $\text{CDCl}_3$ , D1 = 3s) of **15a**

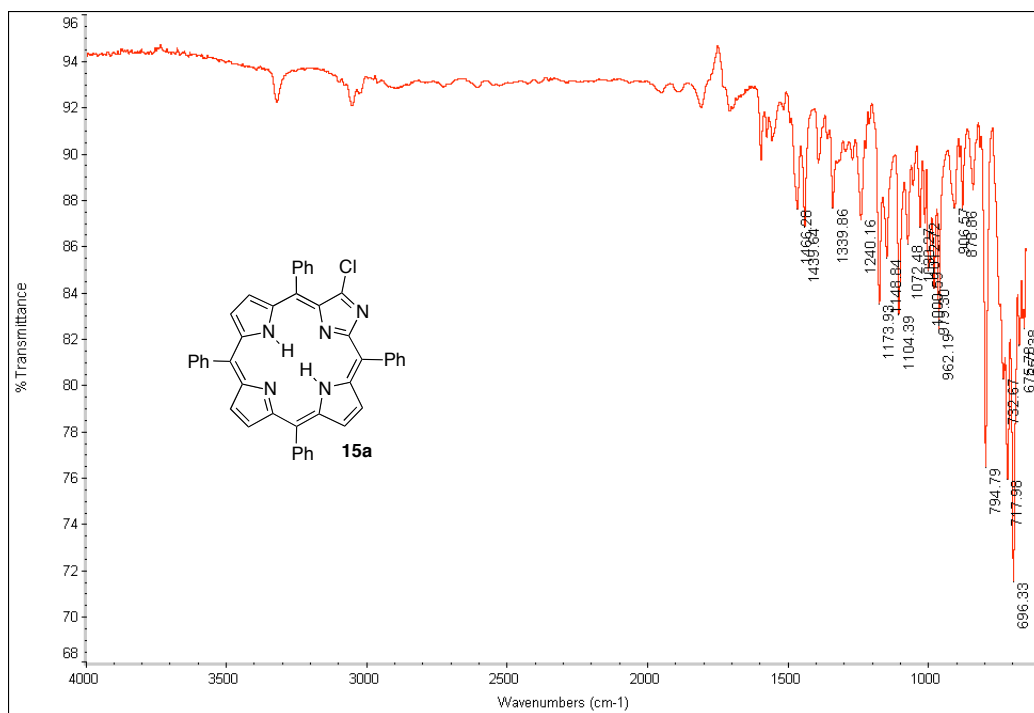

**Figure 39.** FT-IR Spectrum (neat, diffuse reflectance) of **15a**
